# 1 **Self-organization of Tissue Growth by Interfacial Mechanical** 2 **Interactions in Multi-layered Systems**

3

4 Tailin Chen<sup>1,4,#</sup>, Yan Zhao<sup>3,#</sup>, Xinbin Zhao<sup>1</sup>, Shukai Li<sup>1</sup>, Jialing Cao<sup>1</sup>, Jing Du<sup>1,4,6\*</sup>,  
5 Yanping Cao<sup>2,\*</sup>, and Yubo Fan<sup>1,4,5\*</sup>

6

7 <sup>1</sup> Key Laboratory for Biomechanics and Mechanobiology of Chinese Education  
8 Ministry, School of Biological Science and Medical Engineering, Beihang University,  
9 Beijing 100191, China

10 <sup>2</sup> Institute of Biomechanics and Medical Engineering, Department of Mechanical  
11 Engineering, School of Aerospace, Tsinghua University, Beijing 100084, China

12 <sup>3</sup> State Key Laboratory of Advanced Design and Manufacturing for Vehicle Body,  
13 College of Mechanical and Vehicle Engineering, Hunan University, Changsha 410082,  
14 China

15 <sup>4</sup> Beijing Advanced Innovation Centre for Biomedical Engineering, Beihang University,  
16 Beijing 100191, China

17 <sup>5</sup> Key Laboratory of Human Motion Analysis and Rehabilitation Technology of the  
18 Ministry of Civil Affairs, National Research Center for Rehabilitation Technical Aids,  
19 Beijing 100176, China

20 <sup>6</sup> Lead Contact

21 # These authors contributed equally

22

23 \* Correspondence: [dujing@buaa.edu.cn](mailto:dujing@buaa.edu.cn) (J.D.), [caoyanping@tsinghua.edu.cn](mailto:caoyanping@tsinghua.edu.cn) (Y.P.C.),  
24 [yubofan@buaa.edu.cn](mailto:yubofan@buaa.edu.cn) (Y.B.F.)

25

## 26 **Abstract**

27 Morphogenesis is a spatially and temporally regulated process involved in various  
28 physiological and pathological transformations. In addition to the associated  
29 biochemical factors, the physical regulation of morphogenesis has attracted increasing  
30 attention. However, the driving force of morphogenesis initiation remains elusive. Here,  
31 we show that during the growth of multi-layered tissues, morphogenetic process can be  
32 self-organized by the progression of compression gradient stemmed from the interfacial  
33 mechanical interactions between layers. In tissues with low fluidity, the compression  
34 gradient is progressively strengthened during growth and induces stratification by  
35 triggering symmetric-to-asymmetric cell division reorientation at the critical tissue size.  
36 In tissues with high fluidity, compression gradient is dynamic and induces cell junction  
37 remodelling regulated cell rearrangement leading to 2D in-plane morphogenesis instead  
38 of 3D deformation. Morphogenesis can be tuned by manipulating tissue fluidity, cell  
39 adhesion forces and mechanical properties to influence the progression of compression  
40 gradient during the development of cultured cell sheets and chicken embryos. Together,  
41 the dynamics of compression gradient arised from interfacial mechanical interaction  
42 provides a conserved mechanism underlying morphogenesis initiation and size control  
43 during tissue growth.

44

45

46

47 Key words: compression gradient, interfacial interaction, morphogenesis,  
48 biomechanics, self-organization, tissue fluidity

49

## 50 **Introduction**

51 Morphogenesis is a common process that occurs widely in embryonic development,  
52 tissue regeneration and cancer progression. The orchestration of morphogenetic  
53 processes is complex and involves spatial and temporal regulation by biochemical  
54 factors (e.g., cell polarity signals and morphogen gradient) and physical factors (Gallet,  
55 2011; Heisenberg and Bellaiche, 2013; Nishimura and Takeichi, 2008). Emerging  
56 studies have revealed that proper morphogenesis relies on the mechanical force of the  
57 cells and their environment. For example, apical constriction of cells caused by the  
58 contractility of myosin (Martin et al., 2009), cell junction remodelling (e.g., cell  
59 intercalation) (Rauzi et al., 2010) and tissue stiffness-dependent cell migration (Barriga  
60 et al., 2018) have been reported as important mechanisms in tissue shaping during  
61 embryonic development. These studies indicate the essential functions of cellular and  
62 molecular mechanics in the progression of morphogenesis. However, the upstream  
63 events, especially the initial driving forces of morphogenesis, remain unknown.

64 Most biological tissues have multi-layered structures. The interactions between  
65 layers are essential in tissue homeostasis maintenance and morphogenesis during  
66 embryonic development and pathological progression (Bhowmick and Moses, 2005;  
67 Carvalho and Heisenberg, 2010; Lilly, 2014). For example, the interaction between  
68 cancer cells and their adjacent stroma plays a key role in the progression of the diseases,  
69 including tumour invasion (Gupta and Massague, 2006; Mueller and Fusenig, 2004).  
70 In addition to biochemical communications, increasing evidence has shown the  
71 essential role of physical interactions between adjacent layers in the regulation of  
72 morphogenesis (Bailles et al., 2019; Barriga et al., 2018; Carvalho et al., 2009; Munster  
73 et al., 2019). For instance, follicle formation in chicken embryos is initiated by

74 mechanical forces transduced from the dermal layer to the epidermal layer (Shyer et al.,  
75 2017). The villi of human and chicken guts are formed by the compressive stresses  
76 generated by smooth muscle layers on the endoderm and mesenchyme layers (Shyer et  
77 al., 2013). These studies reveal that morphogenesis processes are dependent on the  
78 mutual collaboration and mechanical compatibility of multiple layers. In this sense, it  
79 is necessary and important to address the general mechanism underlying the initiation  
80 of morphogenesis during the growth of various multi-layered tissues.

81 Here, by combining *in vitro* and *in vivo* biological experiments, theoretical analysis  
82 and numerical simulations, we report a general mechanism underlying the initiation of  
83 morphogenesis driven by the progression of compression gradient stemmed from the  
84 interfacial mechanical interactions between growing tissue layers.

85

86

## 87 **Results**

### 88 **Progressive compression gradient is strengthened in epidermal layer during** 89 **chicken feather follicle morphogenesis**

90 During the development of avian skin, the feather follicles develop by the  
91 stratification of single-layered epidermis (Mayerson and Fallon, 1985). In the *in vitro*  
92 culture of chicken skins, we found that the feather primordia emerged at Day 2 in  
93 cultured epidermis combined with dermis after isolation from HH30 stage embryos  
94 (Figure 1a-c). However, when epidermal cell sheet was isolated and cultured alone  
95 (without dermal cell layer), it failed to stratify and no primordium was formed (Figure  
96 1b and c), indicating that the interaction between epidermal and dermal layers is  
97 essential for the morphogenetic process of epidermal cell sheet. Moreover, during the  
98 evolution of epidermis from monolayer to multilayer, the shapes of epidermal cells  
99 showed significant alteration from flat to columnar and correlated with the stages in  
100 embryo development and with the increased epidermal cell layer number (Figure 1d  
101 and e). The deformation degree of epidermal cells was gradually declined with the  
102 increased distance to the primordium center (Figure 1f and g). These experimental  
103 observations indicate that in the beginning of follicle morphogenesis, a local  
104 compression gradient was progressively strengthened in the epidermal cell sheet  
105 accompanied with the 3D deformation of epidermis. According to our previous studies  
106 about the surface wrinkling pattern formation in a non-living chemical film/substrate  
107 composite soft material, the progression of compression gradient could be generated by  
108 mismatch deformation between adjacent layers through interfacial mechanical  
109 interactions, which leads to intriguing morphogenesis (Han et al., 2015; Zhao et al.,  
110 2015a) (Figure S1). Indeed, it has been reported that during the development of chicken

111 skins, dermal cells form aggregations and compress the adjacent epidermal cells to form  
112 follicle primordium (Ho et al., 2019; Shyer et al., 2017). Thus, we hypothesize that the  
113 mismatch deformation between epidermal and dermal layers by dermal cell aggregation  
114 generates compression gradient through interfacial mechanical interactions and causes  
115 stratification of epidermis. However, whether tissue stratification could be triggered by  
116 the mechanical interactions between adjacent layers during tissue growth remains  
117 elusive.

118

### 119 **3D tissue morphogenesis could be self-organized at a critical size in multi-layered** 120 **system**

121 To study the role of interfacial mechanical interactions between layers in the  
122 initiation of tissue morphogenesis, we developed a simple film/substrate system  
123 composed of a freely growing monoclonal cell sheet and extracellular matrix (ECM)  
124 (Figure 2a). To ensure the occurrence of stratification, cells without contact inhibitory  
125 properties were studied. During the continuous live imaging, the emergence of a 2D  
126 monolayer-to-3D multilayer transition was stably observed at a critical tissue size in a  
127 wide variety of cell types including skin-derived cells (B16F10). The critical size was  
128 relatively constant for a given cell type, indicating a self-organized mechanism of  
129 morphogenesis during cell sheet growth (Figure 2a-e). In addition, similar phenomenon  
130 was observed in different types of ECM as well as altered substrate stiffness (Table S1).  
131 The behaviours of individual cells during cell sheet growth prior to the 3D  
132 morphogenesis transition were examined using a holographic imaging cytometer.  
133 Although the cell proliferation rate was negligibly altered during cell sheet expansion  
134 (Supplementary Figure S2a), the average area of individual cells significantly  
135 decreased, and the average cell thickness concurrently increased during cell sheet

136 growth, indicating significant cell deformation (Figure 2f-h). Moreover, the largest cell  
137 deformation was observed at the central region of the cell sheet (Figure 2i-l). Single  
138 cell tracing of cell deformation also suggested significant compression of cells in the  
139 central region of cell sheet (Supplementary Figure S3). This cell deformation behaviour  
140 indicates that during cell sheet growth, a compression gradient within the cell sheet  
141 emerges. To further verify the compression gradient, a scratching experiment was  
142 performed crossing the center to the edge of the cell sheet. After scratching, cells in the  
143 central region showed much faster expansion and migration speed compared with  
144 peripheral cells, indicating the release of compressive strain (Figure S4). Similar  
145 mechanical gradients have also been obtained by Traction Force Microscope (TFM)  
146 and Monolayer Stress Microscopy (MSM) in previous studies (Perez-Gonzalez et al.,  
147 2019; Puliafito et al., 2012; Trepate et al., 2009).

148 To investigate the generation mechanism of compression gradient in the cell sheet  
149 during growth, we performed theoretical analysis. As illustrated in Figure 3a, the cell  
150 sheet is considered as continuum material. During cell sheet expansion caused by cell  
151 proliferation, interfacial shear stress (ISS) would be generated between the cell sheet  
152 and substrate layers. Since the direction of ISS is contrary to the relative motion  
153 between the adjacent layers, the cell sheet is subjected to ISS directed toward the center,  
154 which is consistent with the previous observations by TFM (Trepate et al., 2009). Thus,  
155 cells in the central region of the cell sheet would sustain higher level of compression  
156 than those in other regions (Figure 3a and Supplementary Mechanical Modelling),  
157 which is confirmed by the experimental observations (Figure 2i-l). The elastic strain  
158 energy stored in the cell would increase with the expansion of cell sheet. When the  
159 elastic strain energy in the cell is small, interfacial normal adhesion would impose  
160 restriction on delamination, making the cell monolayer grow in plane. Thus, higher

161 compressive strain would be generated further. When the compressive strain reaches a  
162 critical value, elastic strain energy stored in the cell may be greater than the energy of  
163 interfacial normal adhesion and led to the occurrence of interfacial delamination. In this  
164 critical condition, stratification may happen, and the elastic strain energy can be  
165 released (Supplementary Mechanical Modelling). Indeed, we found that when cell  
166 sheet grew beyond the critical size, amounts of cells in the central region were  
167 delaminated from the substrate (Figure 3b). Theoretical analysis can also give valid  
168 quantitative predictions of experiments. First, theoretical results of the distribution of  
169 cell areas agree well with the experimental results during cell sheet expansion (Figure  
170 3b). According to the theoretical analysis, the critical size of the cell sheet for 3D  
171 morphogenesis depends on the mechanical properties of cell sheet and substrate and  
172 interactions between them. This is confirmed by finite element simulations which well  
173 resembled the morphogenesis at the cell sheet center and also indicated that, when the  
174 compressive strain exceeded the critical value, alterations in the cell-substrate  
175 interactions could significantly affect the compression gradient during cell sheet growth  
176 (Figure 3d and Supplementary Mechanical Modelling). Moreover, experimentally  
177 manipulating cell-substrate interactions using the integrin inhibitor RGD significantly  
178 attenuated the compression gradient and morphogenesis (Figure 3e-g). In addition,  
179 inhibition of the contractility of the cell sheet using the cytoskeleton inhibitor  
180 blebbistatin or myosin shRNA significantly disrupted the compression gradient and  
181 morphogenesis (Figure 3e-g and Supplementary Figure S5). Based on the theoretical  
182 analysis, adhesion between cells may also affect the compression gradient. Consistently,  
183 inhibition of the cell-cell adhesion force by an E-cadherin neutralizing antibody also  
184 reduced the maximum compressive strain in the cell monolayer and inhibited the  
185 morphogenetic process (Figure 3e-g). These results show that the emergent 3D



186 morphogenesis of a cell sheet/substrate system could be physically triggered by  
187 interfacial mechanical interactions between adjacent layers during growth.

188

189 **Critical Compression triggers symmetric-to-asymmetric reorientation of cell**  
190 **division**

191 We proceeded to investigate the biological mechanism of the cell layer number  
192 increase in the central region of the cell sheet induced by cell layer/substrate interfacial  
193 interaction. We found that, in contrast to symmetric (parallel) cell division in the  
194 peripheral region of large cell colonies, abundant asymmetric (oblique or perpendicular)  
195 cell division was observed in the central cells which bore significant compressive  
196 strains (Figure 4a-f). The orientation of the division plane was closely correlated with  
197 cell thickness (Figure 4f). Moreover, after release of compressive strain by cell  
198 scratching, the reorientation of cell division was diminished (Figure S6), indicating the  
199 effect of compression gradient on cell division orientation. This asymmetric cell  
200 division ultimately led at least one daughter cell to locate at the top layer of the cell  
201 sheet (Figure 4g and Supplementary Movies 1 and 2). The cell division reorientation  
202 induced by compression gradient was also confirmed by the subcellular localization of  
203 the nuclear-mitotic apparatus protein (NuMA), which is involved in the orchestration  
204 of mitotic spindle positioning (Pirovano et al., 2019) (Figure 4h). Moreover, spindle-  
205 rocking experiments indicate that cells in the central region showed a significantly  
206 higher level of metaphase plate oscillations which is always associated with asymmetric  
207 cell division (Haydar et al., 2003) (Figure 4i). These results suggest that compression  
208 gradient induced by interfacial interaction between layers triggers cell division  
209 reorientation from symmetric to asymmetric leading to tissue stratification.

210

211 **Tissue fluidity controls 2D/3D morphogenetic transition by regulating**  
212 **compression gradient progression**

213 Our experimental results show large variations in the critical sizes of cell sheets for  
214 3D morphogenesis among different cell types with critical diameter ranging from 356  
215  $\mu\text{m}$  in HeLa to 1997  $\mu\text{m}$  in U2OS cells (Figure 2e). Notably, some cell types, such as  
216 Madin-Darby canine kidney (MDCK) cells, did not display stratification during our  
217 observations. To further investigate the intrinsic properties of tissue layers that affect  
218 the emergent morphogenesis, we compared cell behaviours during cell sheet growth  
219 between HeLa and MDCK cells. First, in order to exclude the influence of contact  
220 inhibition on MDCK cell behaviour, we measured cell proliferation rate and cell density  
221 alterations during cell sheet growth. As shown in Supplemental Figure S2b and d,  
222 MDCK cells did not show contact inhibition during our observation. Moreover,  
223 according to the previous report that MDCK cell sheet did not display contact inhibition  
224 until a critical size of approximately  $2 \times 10^6 \mu\text{m}^2$  (Puliafito et al., 2012). In our  
225 experiment, the cell sheet size of MDCK colony was below  $1 \times 10^5 \mu\text{m}^2$ . Thus, the  
226 differential behavior of MDCK cell sheet was not caused by contact inhibition.  
227 Interestingly, we found that, instead of 3D morphogenesis, MDCK cell sheet showed  
228 dramatic alterations in its in-plane shape during growth, with dynamically organized  
229 protrusions at cell sheet edges, indicating an emergent 2D morphogenesis  
230 (Supplementary Figure S7). While few differences in the proliferation rate were  
231 observed between these two cell types (Supplementary Figure S2a and b), expansion  
232 rate was significantly higher in MDCK cell sheet than in HeLa cell sheet during growth  
233 (Supplementary Figure S2c and d). Importantly, in contrast with the HeLa cell sheet  
234 behaviour, the MDCK cell sheet did not show progressive compression gradient  
235 strengthen during growth (Figure 5). Moreover, while the individual cell area in the

236 HeLa cell sheet was relatively steady, MDCK cells exhibited strong area fluctuation  
237 during cell sheet growth (Figure 6a and b). Particle imaging velocimetry (PIV) analysis  
238 showed that during cell sheet expansion, MDCK cells displayed rapid collective  
239 cellular motion with a higher overall cell velocity (root-mean-square, rms velocity,  $v_{rms}$ ),  
240 indicating a fluid-like state (Garcia et al., 2015). In contrast, the collective behaviour of  
241 HeLa cells showed slower cell motion, indicating a relatively solid-like state (Figure  
242 6c, d and Supplementary Movie 3). The fluidity of these two cell types was further  
243 confirmed by the cell shape index  $p_0$ , the median ratio of the perimeter to the square  
244 root area of the cells. According to the vertex model, if the cell shape index of the  
245 system increases to  $p^*_0 \approx 3.81$ , a transition from a jammed, solid-like state to an  
246 unjammed, fluid-like state occurs (Bi et al., 2015). Over the course of cell sheet growth,  
247 the average cell shape index of MDCK cells was constantly above 3.81, whereas HeLa  
248 cells approached the jamming threshold  $p^*_0$  (Figure 6e and f). Moreover, the cell shape  
249 index was lower in the central region than in the peripheral region of the HeLa cell  
250 sheet (Supplementary Figure S8). At the edges of MDCK cell sheet, especially during  
251 the formation of protrusions, significant collective cell migration (Figure 5a and  
252 Supplementary Movie 4) and abundant cell intercalations such as T1 transitions and  
253 rosettes formation were observed (Figure 7a and b). Cell intercalation is reported as a  
254 mechanism for driving tissue extension in embryonic development (Guillot and Lecuit,  
255 2013) and could be controlled by external constraints acting on the tissue (Aigouy et  
256 al., 2010). In our experiment, most of cell intercalation was observed in cells with  
257 relatively smaller areas (less than  $300 \mu\text{m}^2$ ), indicating a high level of compressive  
258 strain (Figure 7c). Moreover, the cell junction remodelling during intercalation process  
259 was closely correlated with the 2D deformation of cell sheet, indicated by the small  
260 angles between new junctions and tissue protrusion directions (Figure 7d) and higher

261 tissue elongation rate at the direction of new junctions (Figure 7e). To investigate the  
262 effect of the tissue fluidity on the 2D/3D morphogenetic transition, cellular migration  
263 ability was inhibited using the small GTPase Rac1 inhibitor NSC23766 (Raftopoulou  
264 and Hall, 2004). The results showed that Rac1 inhibitor treatment significantly reduced  
265 tissue fluidity (Figure 7f and g and Supplementary Movie 5) and induced higher level  
266 of compressive strain in MDCK cell sheet (Figure 7h and i). Importantly, treatment of  
267 NSC23766 significantly promoted the emergence of tissue stratification (Figure 7j). In  
268 comparison, inhibition of Rho-associated, coiled-coil containing protein kinase (ROCK)  
269 by Y27632 slightly enhanced tissue fluidity of MDCK cells (Figure 7f and g and  
270 Supplementary Movie 5) and had little effect on morphogenesis (Figure 7h-j). These  
271 results suggest that the morphogenesis driven by interfacial mechanical interactions  
272 between tissue layers is dependent on tissue fluidity that higher level of tissue fluidity  
273 may prevent the storage of the compressive strain energy through in-plane cell motion.  
274

### 275 **Progression of compression gradient contributes to epidermal cell stratification** 276 **during chicken skin development**

277 Asymmetric cell division is a common mechanism involved in tissue stratification  
278 and cell fate differentiation during embryogenesis and cancer progression (Lechler and  
279 Fuchs, 2005; Neumuller and Knoblich, 2009). There is evidence that during the  
280 development of chicken skins, the deformation of basement membrane between  
281 epidermis and dermis by the aggregation of dermal cells plays crucial role for the  
282 initiation of follicle primordium formation (Ho et al., 2019; Shyer et al., 2017).  
283 According to our results, tissue stratification could be initiated by the mechanical  
284 interaction at interface between adjacent layers through compression-induced cell  
285 division reorientation. Thus, we proceeded to verify whether this mechanism is applied

286 to the stratification of epidermis during chicken feather follicle morphogenesis. First,  
287 we compared the cell division orientation of the epidermis in single-layered stage and  
288 multi-layered stage during skin development. We found that when epidermis was  
289 stratified, most of the mitotic spindles of epidermal cells were reoriented from  
290 symmetric to asymmetric and the spindle-axis angle was closely correlated with cell  
291 deformation degree (Figure 8a-c). Moreover, reinforcing the progression of  
292 compression gradient by reducing tissue fluidity using Rac1 inhibitor significantly  
293 promoted the progression of epidermis stratification and follicle formation, indicated  
294 by the epidermal cell layer number and pattern geometry of follicle primordium (Figure  
295 8d-i). Reducing tissue fluidity also increased the nuclear localization of  $\beta$ -catenin  
296 protein, indicating the promotion of follicle cell fate determination (Figure 8h and i). In  
297 addition, disrupting the interfacial mechanical interaction between epidermal and  
298 dermal layers by inhibiting epidermal cell/base membrane adhesion using integrin  
299 inhibitor largely attenuated the morphogenesis of primordium (Supplementary Figure  
300 S9). Thus, our findings suggest a model for the initiation of epidermis stratification  
301 during feather follicle formation that dermal cell aggregation induces mismatch  
302 deformation between epidermal layer and basement membrane which generates  
303 progressive compression gradient in epidermal layer and the latter triggers cell division  
304 reorientation leading to epidermis stratification.  
305

## 306 **Discussion**

307

308 In this work, we propose a self-organization mechanism for the initiation of  
309 morphogenesis during tissue growth in which a progressive compression gradient  
310 caused by macroscopic interfacial mechanics drives the initiation of morphogenesis at  
311 certain developing stages in multi-layered tissues. Our experiments and theoretical  
312 analysis show that mismatch deformation between adjacent layers during tissue growth  
313 induces progression of compression gradient by interfacial interactions which triggers  
314 cell delamination and cell division reorientation in solid-like state tissues and ultimately  
315 induces 3D deformation and tissue stratification. Meanwhile, in fluid-like state tissues,  
316 the interaction between adjacent layers induced dynamic progression gradient leading  
317 to 2D tissue deformation instead of 3D deformation (Figure 8j). We also proposed the  
318 crucial role of progressive compression gradient in epidermis generated by the  
319 interaction between epidermal and dermal layers in the initiation of epidermal cell  
320 stratification during chicken skin development. Interestingly, in zebrafish embryos, the  
321 friction force between mesoderm and neurectoderm layers during cell moving has been  
322 reported to be a key determinant in the positioning of neural anlage (Smutny et al.,  
323 2017). Thus, interfacial mechanical interaction between adjacent layers may be a  
324 conserved force origin during embryonic development. Resembling to the instability  
325 process in film/substrate material system, we regard the cell sheet as a film, which is  
326 subjected to the interfacial shear stress during cell sheet expansion. Thus, the growing  
327 cell sheet will be compressed and buckled. We found that cell-cell adhesion, cell-  
328 substrate adhesion, and cell fluidity all affected the degree of cell sheet compression  
329 and tissue stratification. Interestingly, recent studies regard the process of cell  
330 aggregation and layering as the wetting problem and also reveal that inhibiting cell  
331 contraction, cell-to-cell adhesion, and cell-to-substrate adhesion have significant

332 influences on the dewetting process (Perez-Gonzalez et al., 2019; Ravasio et al., 2015).

333 Morphogenetic processes always occur at certain developmental stages during tissue  
334 growth. In *Drosophila* wing disc development, different cell proliferation rates induce  
335 mechanical strain to shape tissues and control tissue size by regulating proliferation and  
336 division orientation (Legoff et al., 2013; Mao et al., 2013). In our experimental model,  
337 2D and 3D morphogenetic process emerges at the critical tissue size, which is  
338 determined by the critical value of the compressive strain generated by interfacial  
339 interaction during tissue growth. This macroscopic mechanical dissipation provides a  
340 possible regulatory mechanism for the spatiotemporal control of morphogenesis and  
341 size control of growing tissues. It has been recognized that crowding is a common  
342 phenomenon in physiological and pathological processes and regulates tissue  
343 homeostasis maintenance (Eisenhoffer et al., 2012; Marinari et al., 2012). A recent  
344 study reports that during the development of zebrafish heart, proliferation-induced  
345 crowding leads to tension heterogeneity that drives cell stratification (Priya et al., 2020).  
346 According to our results, critical compressive strain has profound effects on cell  
347 behaviours, including cell delamination, cell division reorientation and in-plane cell  
348 rearrangement, which all contribute to tissue shaping, homeostasis maintenance and  
349 size control. Moreover, in our model experiment, the compression gradient is  
350 autonomously generated by tissue growth and therefore can well simulate the *in vivo*  
351 crowding conditions with the controlled crowding levels.

352 As an important characteristic of tissues, fluidity (jamming/unjamming state) is  
353 determined by collective cell motion and dynamically altered during tissue growth  
354 (Sadati et al., 2013). Recent studies suggest that tissue fluidity plays crucial roles in  
355 homeostasis maintenance and tumour invasion (Garcia et al., 2015; Miroshnikova et al.,  
356 2018; Park et al., 2016). Saadaoui *et al.* reported that myosin contractility-induced

357 global tissue flow contributed to morphogenesis during avian gastrulation (Saadaoui et  
358 al., 2020). In our work, we found that tissue fluidity could affect the local accumulation  
359 of compressive strain under interfacial interaction between adjacent layers, which  
360 finally regulates tissue deformation patterns (2D or 3D). These findings may provide  
361 insights into the regulatory mechanism underlying morphogenesis by tissue fluidity.

362 There is no doubt that mechanical forces play essential roles in the regulation of  
363 morphogenesis. The role of cell-scale forces generated by cytoskeleton contraction and  
364 transmitted by cell adhesions has been intensively studied in regulating tissue  
365 morphogenesis (Heisenberg and Bellaiche, 2013). However, the upstream regulation  
366 mechanism of these molecular machines, especially at the tissue scale, is rarely  
367 investigated. Our results reveal that progression of compression gradient controlled by  
368 the tissue-scale interfacial shear stress has propounding effects on local cell  
369 delamination, reorientation of division plane and cell intercalation to initiate  
370 morphogenesis. Moreover, the interfacial mechanics could be stemmed from mismatch  
371 deformation during cell migration, aggregation, proliferation, *etc.* Thus, this scale-  
372 spanning mechanical loop from the cell scale to the tissue scale and then returns to the  
373 cell scale may be a fundamental self-organized mechanism during morphogenetic  
374 process in growing multi-layered tissues. Further study is needed to elucidate the  
375 molecular mechanotransduction mechanism underlying the regulation of these cell  
376 behaviours by the progression of compression gradient under interfacial mechanical  
377 interactions.

378 Taken together, our findings unveil a self-organized mechanism that drives the  
379 initiation of morphogenesis in growing multi-layered tissues. These results also open  
380 up a new avenue that tissue-scale forces regulate cell behaviours, which could in turn  
381 facilitate tissue self-organization.





## 383 **Materials and Methods**

### 384 **Cell culture and Immunofluorescence**

385 HeLa, HepG2, Madin-Darby canine kidney (MDCK), MDA-MB-231, U2OS, B16F10  
386 cells were cultured in DMEM medium (containing with 4.5 g/L glucose, L-glutamine,  
387 and sodium pyruvate) supplemented with 10% FBS (Life technologies, CA, USA), and  
388 100 IU/mg penicillin-streptomycin (Life technologies, CA, USA) and 1 % (v/v) NEAA  
389 (Life technologies, CA, USA). For the experimental treatment, we use clones of cells  
390 grown for the same amount of time. The pharmacological agents were added including  
391 Blebbistatin (sigma, 25  $\mu$ M), RGD (Abcam, 50  $\mu$ g/ml), E-cadherin neutralizing  
392 antibody (Biolegend, 10  $\mu$ g/ml), NSC23766 (Abmole, 20  $\mu$ M), Y27632 (Abmole, 20  
393  $\mu$ M) if applicable. Images were taken on the Nikon microscope. Cells were grown at  
394 37 °C in an incubator with 5% CO<sub>2</sub>. Cells grown on glass bottom dishes were fixed  
395 with 4% paraformaldehyde for 10 min at room temperature. Incubate the cells with 5%  
396 BSA, in PBST (PBS+0.1% Tween 20) for 2 hours. Cells were incubated with primary  
397 antibodies at the optimal concentrations (according to the manufacturer's instructions)  
398 at 4 °C overnight. After washing, cells were incubated for 2 hours with secondary  
399 antibodies: 488/568/633 IgG (H+L) and/or Alexa Flour 568/647 phalloidin (Invitrogen)  
400 for 1 hour. Cell nucleus were stained with DAPI (4',6-diamidino-2-phenylindole,  
401 Invitrogen) for 10 min at room temperature. Confocal images were taken on the Leica  
402 microscope equipped with a 10x, 40x or 63x objective. Experiments were replicated at  
403 least three times.

404

405

406

407 **Live imaging**

408 Live cell imaging was performed in Leica microscope or HoloMonitor M4, enclosed in  
409 an incubator to maintain the samples at 37 °C and 5% of CO<sub>2</sub> throughout the  
410 experiments. Images were acquired every 10 min with Leica software. Spindle-rocking  
411 experiments were acquired every 3 min with Leica microscope. HoloMonitor M4 is a  
412 Quantitative phase imaging-based cell analyzer utilizing the principle of digital  
413 holographic microscopy. Live cell imaging was performed in HoloMonitor M4,  
414 enclosed in an incubator to maintain the samples at 37 °C and 5% of CO<sub>2</sub> throughout  
415 the experiments. Images were acquired every 10 min with HStudio 2.7.

416

417 **PIV (Particle Image Velocimetry) measurement**

418 PIV analysis was conducted using a custom algorithm based on the MatPIV software  
419 package for MATLAB. We used a series of live cell images of HeLa and MDCK to  
420 calculate the velocity of the cells in the cell sheet. The mean velocity was subtracted  
421 from calculated velocity fields to avoid any drift-related bias and to get the velocity  
422 fields of the cells (the net movement of the cell cluster for its drift is less than 10% and  
423 can be ignored). The heat maps of magnitude are also exported subtracting the mean  
424 velocity. From the exported text files, we measured the overall cell speed, or root-mean-  
425 square (rms) velocity  $v_{rms}$  and calculated the average  $v_{rms}$  of each type of cell. The  
426 correlation algorithm was coded using MATLAB in our lab. Experiments were  
427 replicated at least three times.

428

429

430

## 431 **Image processing, segmentation and quantification**

432 Cell data analysis of HoloMonitor M4: Cell area, cell thickness, cell sheet area and cell  
433 sheet thickness were analyzed by the software HStudio 2.7. HStudio 2.7 can  
434 automatically segment and extract physical parameters of the cell. For more details,  
435 please refer to the official manual.

436 The area of cell clones and individual cells: Cell boundary labeling and areas were  
437 determined manually in Fiji.

438 Cell thickness, width and division angle: The collected confocal tomography images  
439 were imported into Bitplane imaris for 3D reconstruction. After reconstruction, XZ and  
440 YZ profiles were randomly selected to measure thickness, width and cell division angle  
441 manually. Data was measured on three samples, using three regions of the image.

442 Thickness, width and division angle in chicken embryo skin: The collected confocal  
443 tomography images were imported into Bitplane imaris. Cell thickness, length, and  
444 division Angle were measured manually on software.

445 Pattern geometry in Chicken embryo skin: Diameter and spacing was measured  
446 manually using Fuji.

447 Shape index: To determine the cell boundary, we used a semi-automatic segmentation  
448 pipeline. We manually enhanced the blurry boundaries of the cells. After processing  
449 the image by binary Ostu, we produced the finally image by Median filtering. We  
450 extracted the parameters by image segmentation to obtain the area and perimeter.

451 Cell trajectory: The cell tracking image is produced by software Bitplane imaris.

452 Cell junction analysis: Cell boundary labeling and areas were determined manually in  
453 Fiji(Firmino et al., 2016).

454

455 **Strain field analysis**

456 The area of each cell was calculated by Fuji software, and the compression strain of each  
457 cell was calculated according to Eq (3) in Supplementary Materials. Finally, origin  
458 software is used to draw the compression strain diagram. The strain field is obtained by  
459 analyzing variation of cell area using Eq. (4) in Supplementary Materials.

460

461 **Finite element simulations**

462 Finite element simulations were performed using commercial software ABAQUS  
463 (2016). Details of the finite element method were present in the Supplementary  
464 Materials. In the finite element model, the growing cell monolayer sheet was placed on  
465 a stiff substrate with the interfacial friction factor being controlled. The cell sheet was  
466 under isotropic expansion to simulate cell proliferation and growth. The cell sheet was  
467 modeled as the linear elastic material. No other boundary conditions were applied on  
468 the cell sheet.

469

470 **Skin culture and immunofluorescence**

471 Fertilized eggs were bought from local farms. The eggs were cultured in a moist  
472 environment at 37 °C and staged according to Hamburger and Hamilton. Dorsal skin  
473 pieces were dissected from E6 embryos and spread flat on the Polycarbonate membrane  
474 (pore size: 0.4 µm, Corning, Cat.No.3413). Culture is DMEM with 2% chick serum and  
475 10% FBS along with pharmacological agents NSC23766 (Abmole, 20 µM), RGD  
476 (Abcam, 100 µg/ml) if applicable. Skin pieces were cultured for 48 hours at 37 °C  
477 before being fixed in 4% paraformaldehyde in PBS. Images were taken on the Nikon

478 stereoscopic microscope. Pattern geometry was calculated using Fiji to measure the  
479 spacing and diameter. Skin culture details were performed as previously described. For  
480 immunofluorescence staining, Embryos or cultured dissected skin pieces were fixed in  
481 4% paraformaldehyde in PBS and embedded in OCT. The tissue blocks were placed in  
482 liquid nitrogen for 1 minute and frozen section. The section thickness is about 14  $\mu\text{m}$ .  
483 We incubate the sections with 5% BSA, in PBST (PBS + 0.1% Tween 20) for 2 hours.  
484 The sections were incubated with primary antibodies at the optimal concentrations  
485 (according to the manufacturer's instructions) at 4 °C overnight. After being washed  
486 with PBS, the sections were incubated for 2 hours with secondary antibodies:  
487 488/568/633 IgG (H+L) for 1 hour. Nucleus were stained with DAPI (4', 6-diamidino-  
488 2-phenylindole, Invitrogen) for 10 min at room temperature. Confocal images were  
489 taken on the Leica microscope equipped with a 10 x, 40 x or 63 x objective.  
490 Experiments were replicated at least three times.

491

## 492 **Quantification and Statistical analysis**

493 The number of biological replicates in each experimental result was indicated in the  
494 figure legends. Data were presented as means  $\pm$  SEM. Significance was determined  
495 using Student's t test to compare the differences between two experimental groups.

496

497

498

## 499 **References**

- 500 Aigouy, B., Farhadifar, R., Staple, D.B., Sagner, A., Roper, J.C., Julicher, F., and Eaton,  
501 S. (2010). Cell flow reorients the axis of planar polarity in the wing epithelium of  
502 *Drosophila*. *Cell* *142*, 773-786.
- 503 Bailles, A., Collinet, C., Philippe, J.M., Lenne, P.F., Munro, E., and Lecuit, T. (2019).  
504 Genetic induction and mechanochemical propagation of a morphogenetic wave. *Nature*  
505 *572*, 467-473.
- 506 Barriga, E.H., Franze, K., Charras, G., and Mayor, R. (2018). Tissue stiffening  
507 coordinates morphogenesis by triggering collective cell migration in vivo. *Nature* *554*,  
508 523-527.
- 509 Bhowmick, N.A., and Moses, H.L. (2005). Tumor-stroma interactions. *Curr Opin*  
510 *Genet Dev* *15*, 97-101.
- 511 Bi, D., Lopez, J., Schwarz, J.M., and Manning, M.L.J.N.P. (2015). A density-  
512 independent rigidity transition in biological tissues. *11*, 1074.
- 513 Carvalho, L., and Heisenberg, C.P. (2010). The yolk syncytial layer in early zebrafish  
514 development. *Trends Cell Biol* *20*, 586-592.
- 515 Carvalho, L., Stuhmer, J., Bois, J.S., Kalaidzidis, Y., Lecaudey, V., and Heisenberg,  
516 C.P. (2009). Control of convergent yolk syncytial layer nuclear movement in zebrafish.  
517 *Development* *136*, 1305-1315.
- 518 Eisenhoffer, G.T., Loftus, P.D., Yoshigi, M., Otsuna, H., Chien, C.B., Morcos, P.A.,  
519 and Rosenblatt, J. (2012). Crowding induces live cell extrusion to maintain homeostatic  
520 cell numbers in epithelia. *Nature* *484*, 546-549.
- 521 Firmino, J., Rocancourt, D., Saadaoui, M., Moreau, C., and Gros, J. (2016). Cell  
522 Division Drives Epithelial Cell Rearrangements during Gastrulation in Chick.  
523 *Developmental cell* *36*, 249-261.
- 524 Gallet, A. (2011). Hedgehog morphogen: from secretion to reception. *Trends Cell Biol*  
525 *21*, 238-246.
- 526 Garcia, S., Hannezo, E., Elgeti, J., Joanny, J.F., Silberzan, P., and Gov, N.S. (2015).  
527 Physics of active jamming during collective cellular motion in a monolayer. *Proc Natl*  
528 *Acad Sci U S A* *112*, 15314-15319.
- 529 Guillot, C., and Lecuit, T. (2013). Mechanics of epithelial tissue homeostasis and  
530 morphogenesis. *Science* *340*, 1185-1189.
- 531 Gupta, G.P., and Massague, J. (2006). Cancer metastasis: building a framework. *Cell*  
532 *127*, 679-695.
- 533 Han, X., Zhao, Y., Cao, Y., and Lu, C. (2015). Controlling and prevention of surface  
534 wrinkling via size-dependent critical wrinkling strain. *Soft Matter* *11*, 4444-4452.
- 535 Haydar, T.F., Ang, E., Jr., and Rakic, P. (2003). Mitotic spindle rotation and mode of  
536 cell division in the developing telencephalon. *Proc Natl Acad Sci U S A* *100*, 2890-  
537 2895.
- 538 Heisenberg, C.P., and Bellaiche, Y. (2013). Forces in tissue morphogenesis and  
539 patterning. *Cell* *153*, 948-962.
- 540 Ho, W.K.W., Freem, L., Zhao, D., Painter, K.J., Woolley, T.E., Gaffney, E.A., McGrew,  
541 M.J., Tzika, A., Milinkovitch, M.C., Schneider, P., *et al.* (2019). Feather arrays are  
542 patterned by interacting signalling and cell density waves. *PLoS Biol* *17*, e3000132.
- 543 Lechler, T., and Fuchs, E. (2005). Asymmetric cell divisions promote stratification and  
544 differentiation of mammalian skin. *Nature* *437*, 275-280.

- 545 Legoff, L., Rouault, H., and Lecuit, T. (2013). A global pattern of mechanical stress  
546 polarizes cell divisions and cell shape in the growing *Drosophila* wing disc.  
547 *Development* *140*, 4051-4059.
- 548 Lilly, B. (2014). We have contact: endothelial cell-smooth muscle cell interactions.  
549 *Physiology (Bethesda)* *29*, 234-241.
- 550 Mao, Y., Tournier, A.L., Hoppe, A., Kester, L., Thompson, B.J., and Tapon, N. (2013).  
551 Differential proliferation rates generate patterns of mechanical tension that orient tissue  
552 growth. *EMBO J* *32*, 2790-2803.
- 553 Marinari, E., Mehonic, A., Curran, S., Gale, J., Duke, T., and Baum, B. (2012). Live-  
554 cell delamination counterbalances epithelial growth to limit tissue overcrowding.  
555 *Nature* *484*, 542-545.
- 556 Martin, A.C., Kaschube, M., and Wieschaus, E.F. (2009). Pulsed contractions of an  
557 actin-myosin network drive apical constriction. *Nature* *457*, 495-499.
- 558 Mayerson, P.L., and Fallon, J.F. (1985). The spatial pattern and temporal sequence in  
559 which feather germs arise in the white Leghorn chick embryo. *Dev Biol* *109*, 259-267.
- 560 Miroshnikova, Y.A., Le, H.Q., Schneider, D., Thalheim, T., Rubsam, M., Bremicker,  
561 N., Polleux, J., Kamprad, N., Tarantola, M., Wang, I., *et al.* (2018). Adhesion forces  
562 and cortical tension couple cell proliferation and differentiation to drive epidermal  
563 stratification. *Nat Cell Biol* *20*, 69-80.
- 564 Mueller, M.M., and Fusenig, N.E. (2004). Friends or foes - bipolar effects of the tumour  
565 stroma in cancer. *Nat Rev Cancer* *4*, 839-849.
- 566 Munster, S., Jain, A., Mietke, A., Pavlopoulos, A., Grill, S.W., and Tomancak, P.  
567 (2019). Attachment of the blastoderm to the vitelline envelope affects gastrulation of  
568 insects. *Nature* *568*, 395-399.
- 569 Neumuller, R.A., and Knoblich, J.A. (2009). Dividing cellular asymmetry: asymmetric  
570 cell division and its implications for stem cells and cancer. *Genes Dev* *23*, 2675-2699.
- 571 Nishimura, T., and Takeichi, M. (2008). Shroom3-mediated recruitment of Rho kinases  
572 to the apical cell junctions regulates epithelial and neuroepithelial planar remodeling.  
573 *Development* *135*, 1493-1502.
- 574 Park, J.A., Atia, L., Mitchel, J.A., Fredberg, J.J., and Butler, J.P. (2016). Collective  
575 migration and cell jamming in asthma, cancer and development. *J Cell Sci* *129*, 3375-  
576 3383.
- 577 Perez-Gonzalez, C., Alert, R., Blanch-Mercader, C., Gomez-Gonzalez, M., Kolodziej,  
578 T., Bazellieres, E., Casademunt, J., and Trepat, X. (2019). Active wetting of epithelial  
579 tissues. *Nat Phys* *15*, 79-88.
- 580 Pirovano, L., Culurgioni, S., Carminati, M., Alfieri, A., Monzani, S., Cecatiello, V.,  
581 Gaddoni, C., Rizzelli, F., Foadi, J., Pasqualato, S., *et al.* (2019). Hexameric  
582 NuMA:LGN structures promote multivalent interactions required for planar epithelial  
583 divisions. *Nat Commun* *10*, 2208.
- 584 Priya, R., Allanki, S., Gentile, A., Mansingh, S., Uribe, V., Maischein, H.M., and  
585 Stainier, D.Y.R. (2020). Tension heterogeneity directs form and fate to pattern the  
586 myocardial wall. *Nature* *588*, 130-134.
- 587 Puliafito, A., Hufnagel, L., Neveu, P., Streichan, S., Sigal, A., Fygenson, D.K., and  
588 Shraiman, B.I. (2012). Collective and single cell behavior in epithelial contact  
589 inhibition. *Proceedings of the National Academy of Sciences of the United States of*  
590 *America* *109*, 739-744.
- 591 Raftopoulou, M., and Hall, A. (2004). Cell migration: Rho GTPases lead the way. *Dev*  
592 *Biol* *265*, 23-32.
- 593 Rauzi, M., Lenne, P.F., and Lecuit, T. (2010). Planar polarized actomyosin contractile  
594 flows control epithelial junction remodelling. *Nature* *468*, 1110-1114.



595 Ravasio, A., Le, A.P., Saw, T.B., Tarle, V., Ong, H.T., Bertocchi, C., Mege, R.M., Lim,  
596 C.T., Gov, N.S., and Ladoux, B. (2015). Regulation of epithelial cell organization by  
597 tuning cell-substrate adhesion. *Integr Biol (Camb)* 7, 1228-1241.  
598 Saadaoui, M., Rocancourt, D., Roussel, J., Corson, F., and Gros, J. (2020). A tensile  
599 ring drives tissue flows to shape the gastrulating amniote embryo. *Science* 367, 453-  
600 458.  
601 Sadati, M., Taheri Qazvini, N., Krishnan, R., Park, C.Y., and Fredberg, J.J. (2013).  
602 Collective migration and cell jamming. *Differentiation* 86, 121-125.  
603 Shyer, A.E., Rodrigues, A.R., Schroeder, G.G., Kassianidou, E., Kumar, S., and  
604 Harland, R.M. (2017). Emergent cellular self-organization and mechanosensation  
605 initiate follicle pattern in the avian skin. *Science* 357, 811-815.  
606 Shyer, A.E., Tallinen, T., Nerurkar, N.L., Wei, Z., Gil, E.S., Kaplan, D.L., Tabin, C.J.,  
607 and Mahadevan, L. (2013). Villification: how the gut gets its villi. *Science* 342, 212-  
608 218.  
609 Smutny, M., Akos, Z., Grigolon, S., Shamipour, S., Ruprecht, V., Capek, D., Behrndt,  
610 M., Papusheva, E., Tada, M., Hof, B., *et al.* (2017). Friction forces position the neural  
611 anlage. *Nat Cell Biol* 19, 306-317.  
612 Trepats, X., Wasserman, M.R., Angelini, T.E., Millet, E., Weitz, D.A., Butler, J.P., and  
613 Fredberg, J.J. (2009). Physical forces during collective cell migration. *Nat Phys* 5, 426-  
614 430.  
615 Zhao, Y., Han, X., Li, G., Lu, C., Cao, Y., Feng, X.-Q., Gao, H.J.J.o.t.M., and Solids,  
616 P.o. (2015a). Effect of lateral dimension on the surface wrinkling of a thin film on  
617 compliant substrate induced by differential growth/swelling. 83, 129-145.  
618 Zhao, Y., Han, X., Li, G.Y., Lu, C.H., Cao, Y.P., Feng, X.Q., and Gao, H.J. (2015b).  
619 Effect of lateral dimension on the surface wrinkling of a thin film on compliant  
620 substrate induced by differential growth/swelling. *J Mech Phys Solids* 83, 129-145.  
621  
622

## 623 **Acknowledgments**

624 **General:** We thank J. Y. Fu (China Agricultural University) for providing GFP-H2B+  
625 U2OS cells and C. Dong (The Pennsylvania State University), Y. Liang (EV-bio) and  
626 C. Y. Xiong (Peking University) for discussions during the preparation of this paper.  
627 We also thank S. Wu (China Agricultural University) and X. Liu (Beihang University)  
628 for technical support of chicken embryonic experiments and PIV analysis, respectively.

629

630 **Funding:** This work was supported by the National Key R&D Program of China  
631 (2017YFA0506500, 2016YFC1102203, and 2016YFC1101100), the National Natural  
632 Science Foundation of China (31370018, 11972206, 11902114, 11421202, 11827803,  
633 and 11902020), and Fundamental Research Funds for the Central Universities  
634 (ZG140S1971).

635

636 **Author contributions:** T.L.C, Y.Z., J.D., Y.P.C, and Y.B.F. designed the study,  
637 performed and interpreted experiments. X.B.Z. and S.K.L. helped with cell experiments  
638 and statistical analysis. J.L.C helped with PIV analysis. Y.Z. and Y.P.C. did mechanical  
639 analysis. J.D., Y.P.C., and Y.B.F. conceived and supervised this project and prepared the  
640 paper.

641

642 **Competing interests:** There are no competing interests.

643

644 **Figures and Tables**

645 **Figure 1**

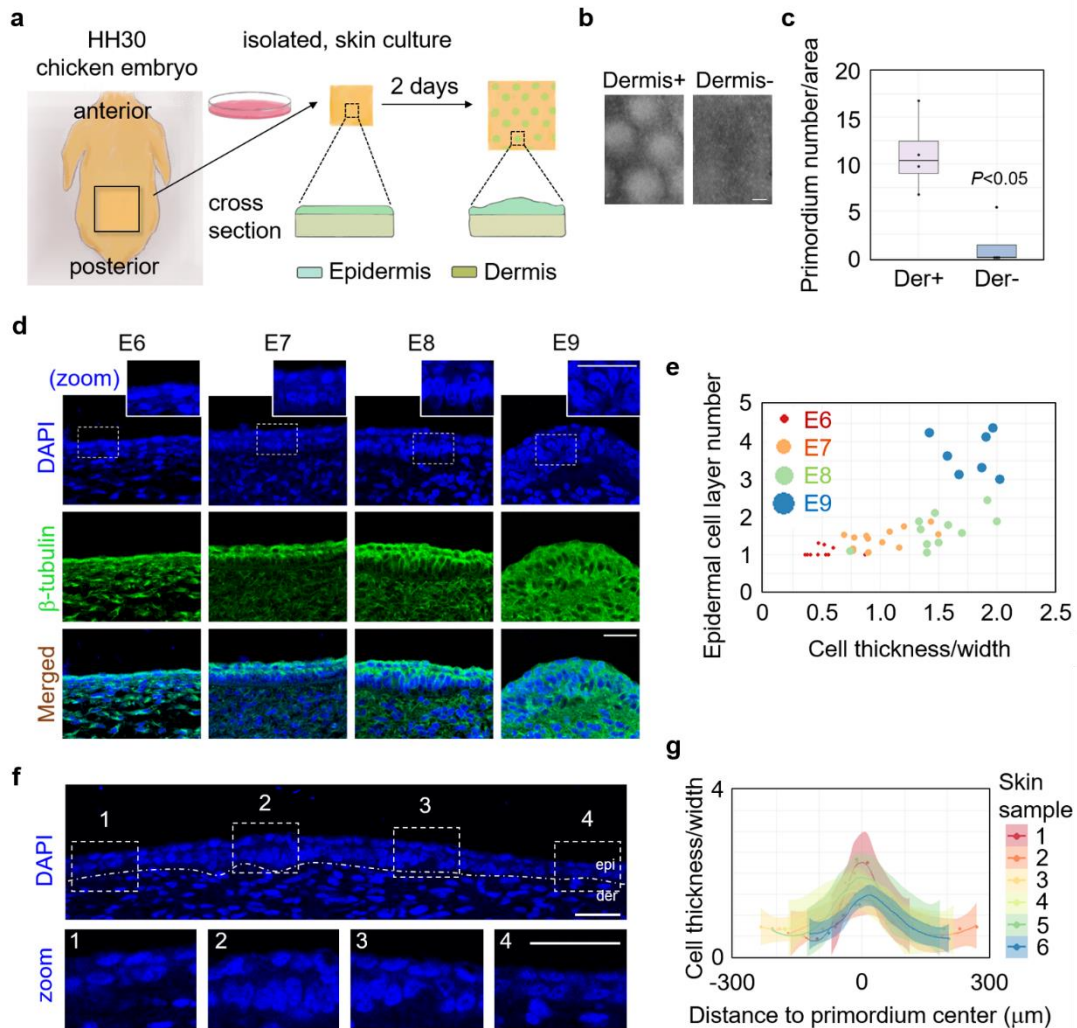

646

647

648 **Figure 1. Progressive compression gradient is strengthened in epidermal layer**

649 **during chicken feather follicle morphogenesis.** (a) The illustration of experimental

650 workflow for studying the epidermal morphogenesis in cultured chicken skins. (b) *In*

651 *vitro* culture of embryonic chicken skin with (Der+) or without (Der-) dermal cell layer.

652 Scale bar: 500  $\mu\text{m}$ . (c) The statistical analysis of primordium number per area ( $\text{mm}^2$ ) in

653 (b). (d) Images of skin tissues from different stages of chicken embryos showing the  
654 deformation of epidermal cell shape. Scale bar: 25  $\mu\text{m}$ . (e) The statistical analysis of  
655 cell deformation (thickness/width) and cell layer number of epidermis in skin tissues  
656 from different stages of chicken embryos. Each dot represents the average value of an  
657 embryo. (f) Images of epidermal cell shape deformation at different location around the  
658 center of primordium. Scale bar: 25  $\mu\text{m}$ . (g) The statistical analysis of cell deformation  
659 (thickness/width) with different distance to the center of primordium.  
660

661 **Figure 2**

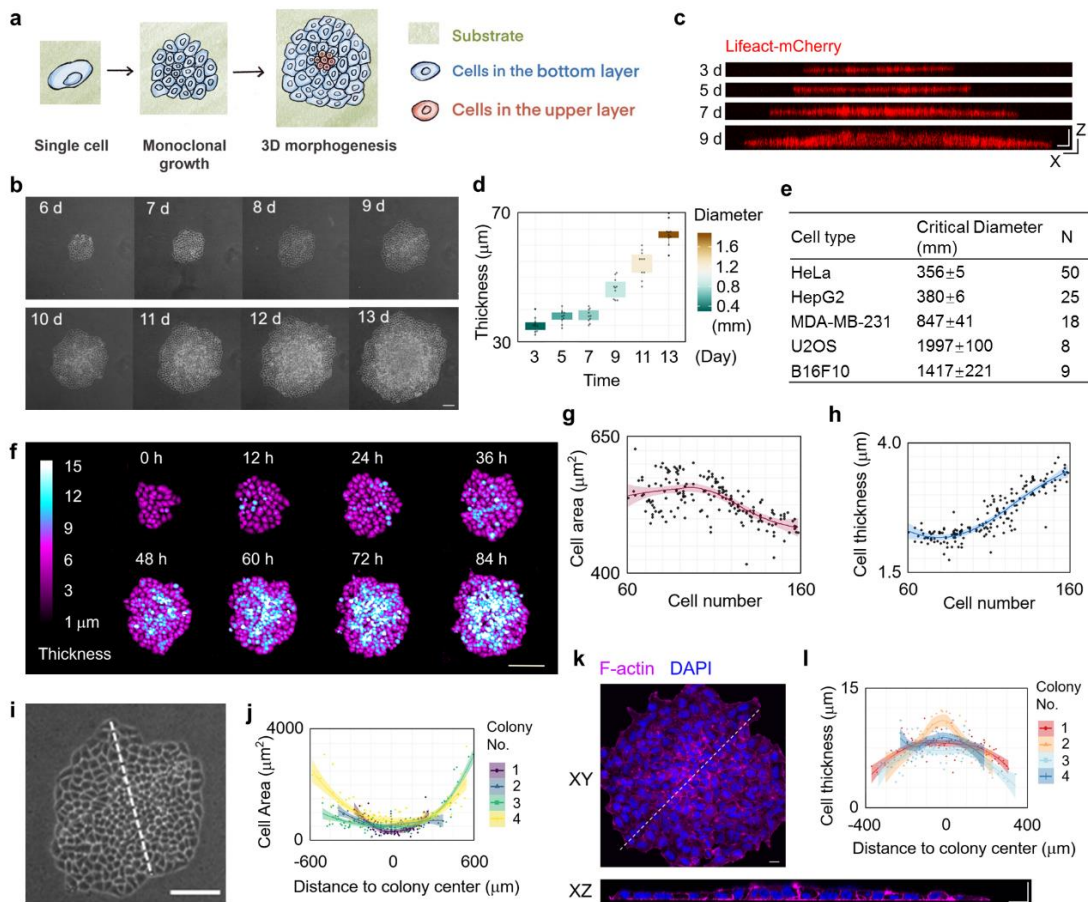

662

663

664 **Figure 2. Emergent 3D morphogenesis in a growing monoclonal cell sheet at**

665 **critical size.** (a) The illustration of experimental workflow for studying the emergent

666 3D morphogenesis in a freely growing monolayer HeLa cell sheet. (b) Representative

667 phase contrast images of a growing monoclonal HeLa cell sheet captured at the

668 indicated time (d: day) after seeding. Scale bar: 100  $\mu\text{m}$ . (c-d) XZ slice images of F-

669 actin indicated by Lifeact-mCherry in a growing monoclonal Lifeact-mCherry<sup>+</sup> HeLa

670 cell sheet captured at the indicated time after seeding. Scale bar: 50  $\mu\text{m}$ . The statistical

671 analysis of cell sheet thickness and diameter of a growing HeLa cell sheet. (n = 10). (e)

672 The critical size for 3D morphogenesis of growing cell sheet in different cell types. (f)

673 The representative live images of a growing HeLa cell sheet using HoloMonitor M4  
674 time-lapse cytometer. Scale bar: 150  $\mu\text{m}$ . (g) The statistical analysis of the area of  
675 individual cell during HeLa cell sheet growth. (h) The statistical analysis of the  
676 thickness of individual cell during HeLa cell sheet growth. (i) The magnified view of  
677 HeLa cell sheet at 8 d in (b). Scale bar: 100  $\mu\text{m}$ . (j) The statistical analysis of the  
678 individual cell area along the lines in (i). (k) Representative XY and XZ slice images  
679 of F-actin and nucleus stained by Phalloidin and DAPI respectively in HeLa cell sheet.  
680 Scale bar: 20  $\mu\text{m}$ . (l) The statistical analysis of the individual cell thickness along the  
681 lines in (i).

682

683 **Figure 3**

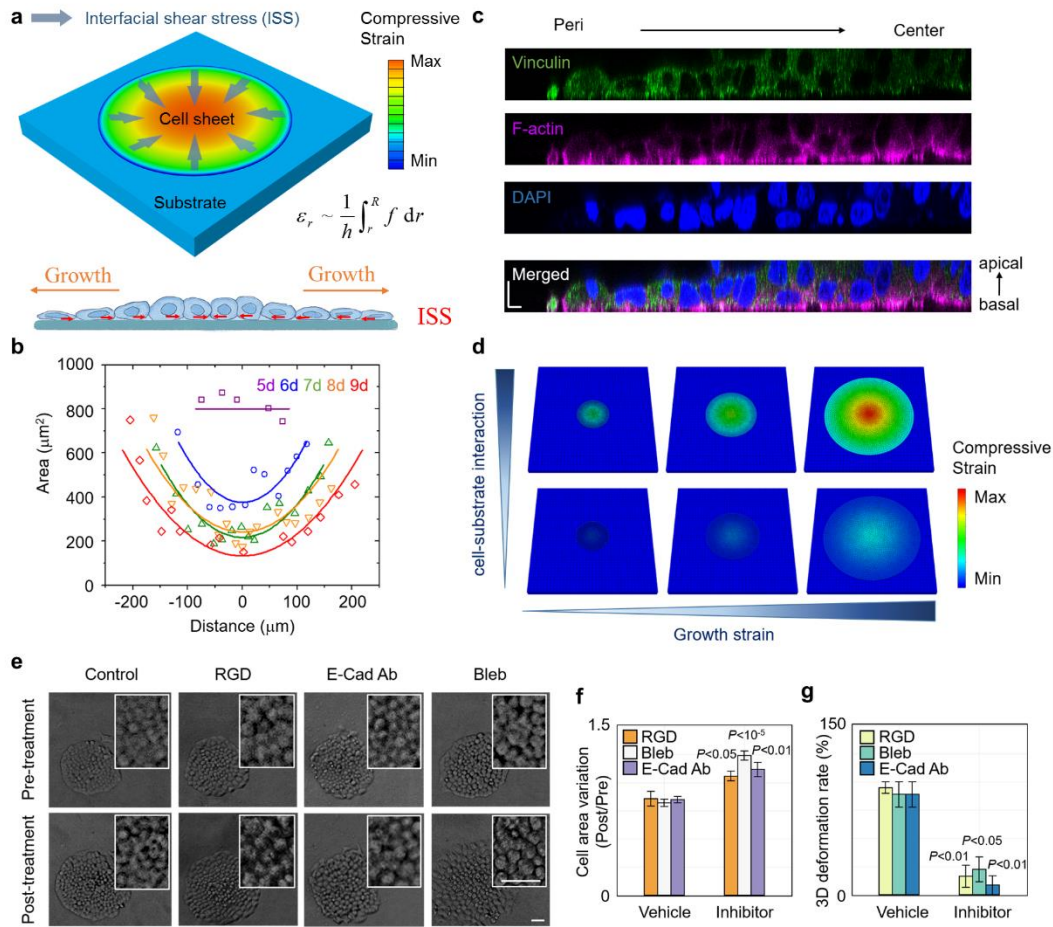

684

685

686 **Figure 3. Size-dependent 3D morphogenesis is induced by interfacial shear stress**

687 **in multi-layered system.** (a) Theoretical model of a cell monolayer sheet growing on

688 a substrate.  $f$  is the interfacial shear stress between the cell sheet and substrate generated

689 by relative motion.  $h$  is the thickness of cell sheet.  $\sigma_r$  is the compressive stress in the

690 cell sheet induced by the interfacial shear stress.  $R$  is the outer radius of the cell sheet

691 and  $r$  is the distance between cell and center of the monolayer sheet. Diagrams of

692 interfacial shear stress between cell and substrate. Direction of interfacial shear stress

693 is contrary to the cell sheet expansion, as the yellow arrow points out. (b) Area of the

694 individual cell along a random line across the center of the cell sheet. Data points refer

695 to the experimental results and corresponding lines are theoretical predictions obtained  
696 by fitting the experimental data using Eq. 6 in Supplementary Materials. (c)  
697 Representative XZ slice image of Vinculin, F-actin and nucleus stained by Vinculin  
698 antibody, Phalloidin and DAPI respectively in half of a HeLa cell sheet. Scale bar: 10  
699  $\mu\text{m}$ . (d) Finite element simulation of the stress field in the growing cell monolayer with  
700 different cell-substrate interactions ( $f_{\text{top}} / f_{\text{bottom}} = 5$ ). Growth strains from left to right  
701 are 10%, 60% and 120%, respectively. Color bar shows the distribution of the  
702 compressive stress in the cell monolayer. (e) Representative phase contrast images of  
703 HeLa cell sheet in the presence of inhibitors or vehicle. Scale bar: 50  $\mu\text{m}$ . (f) The  
704 statistical analysis of the individual cell area of HeLa cell sheet in the presence of  
705 inhibitors or vehicle. ( $n = 10$ ). (g) The morphogenesis percentage of HeLa cell sheet in  
706 the presence of inhibitors or vehicle. ( $n = 3$ ).

707



708 **Figure 4**

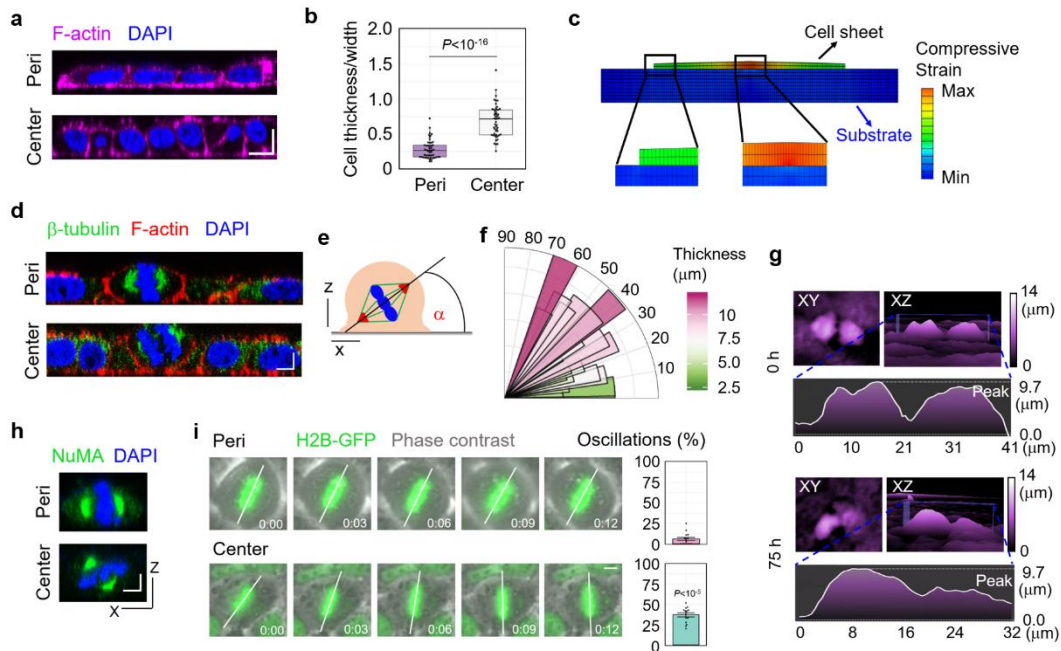

709

710

711 **Figure 4. Critical Compression triggers cell division reorientation to induce tissue**

712 **stratification.** (a) Representative XZ slice image of F-actin and nucleus stained by

713 Phalloidin and DAPI respectively in the central region and peripheral region of HeLa

714 cell sheet. Scale bar: 10  $\mu$ m. (b) The statistical analysis of cell deformation

715 (thickness/width) in the center region and peripheral region of HeLa cell sheet. (n = 50).

716 (c) Cell shape variation induced by interfacial shear stress. (d) Representative XZ slice

717 image of  $\beta$ -tubulin, F-actin and nucleus stained by  $\beta$ -tubulin antibody, Phalloidin and

718 DAPI respectively in the central region and peripheral region of HeLa cell sheet. Scale

719 bar: 5  $\mu$ m. (e) The schematic experimental setting of the mitotic spindle orientation. (f)

720 Distribution of the spindle-axis angles of cells with different thickness in HeLa cell

721 sheet. (g) The representative images of dividing cells before (0 h) and after (75 h)

722 critical compression during HeLa cell sheet growth using HoloMonitor M4 time-lapse

723 cytometer. (h) Representative XZ slice image of NuMA and nucleus stained by NuMA

724 antibody and DAPI respectively in the central region and peripheral region of HeLa  
725 cell sheet. Scale bar: 5  $\mu\text{m}$ . (i) Analysis of spindle oscillation in in the central region  
726 and peripheral region of GFP-H2B<sup>+</sup> U2OS cell sheet. The extent of oscillation was  
727 calculated and plotted in bar graphs on the right. Scale bar: 5  $\mu\text{m}$ . (n = 14).  
728

729 **Figure 5**

730

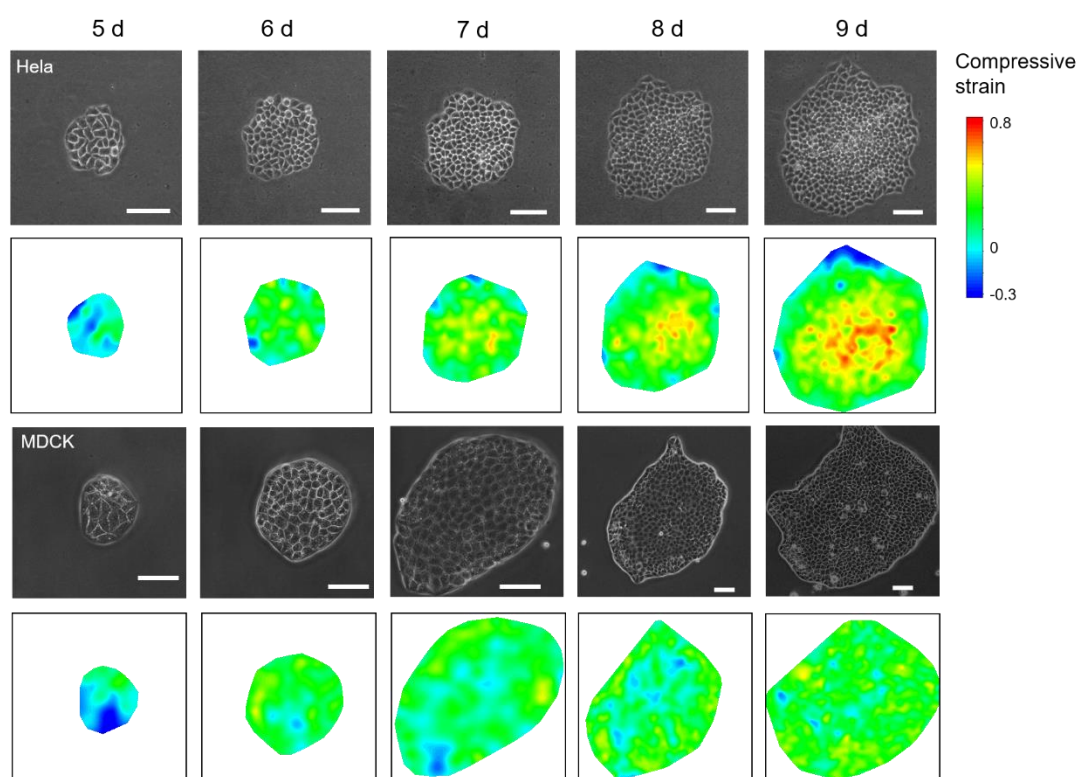

731

732 **Figure 5. Strain field evolution of HeLa and MDCK cell sheets.** The calculated strain  
733 field evolution during the growth of HeLa and MDCK cell sheets at the indicated time  
734 (d: day) after seeding. Compressive strain field was calculated using Eq. (4) in the  
735 Supplementary materials by measuring the areas of each cell. The normal area of a full-  
736 grown cell without sustaining compression was set as the average area of the cell sheet  
737 in 1 d since the compressive gradient is small in the initial stage. Scale bar: 100  $\mu\text{m}$ .

738

739 **Figure 6**

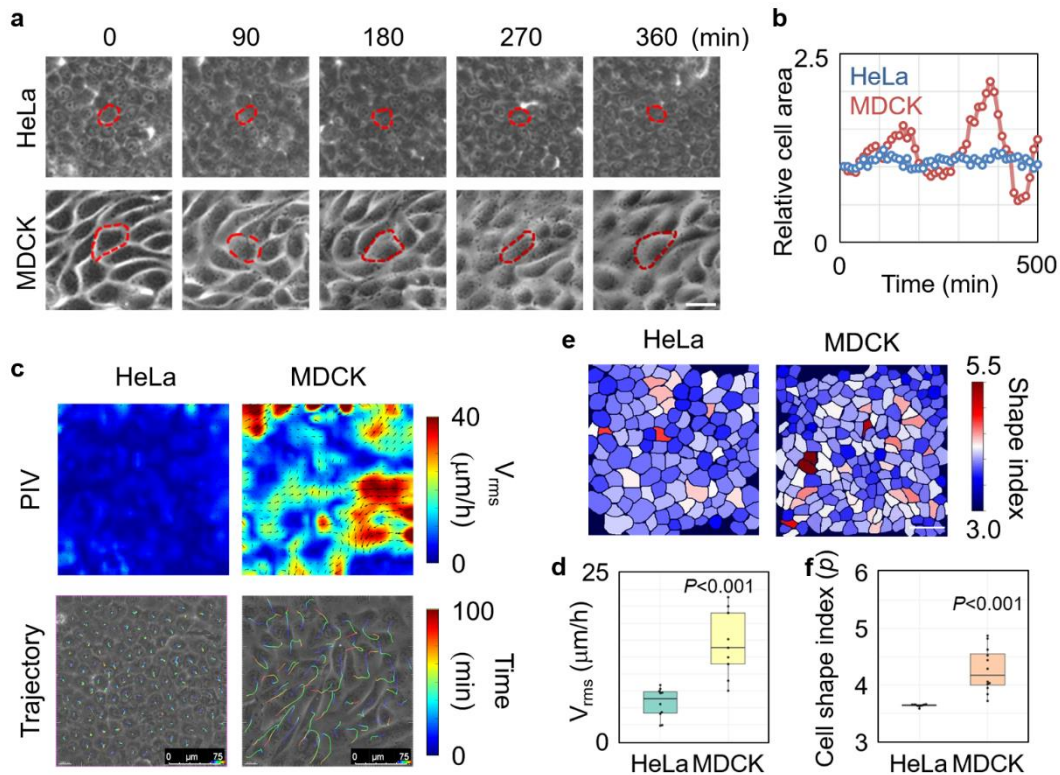

740

741

742 **Figure 6. HeLa and MDCK cell sheets show different fluidity during growth. (a)**

743 The fluctuation of individual cell shape during the growth of HeLa and MDCK cell

744 sheets. Scale bar: 25  $\mu\text{m}$ . (b) The area alteration with time of the cell indicated by dotted

745 line in (a). (c) Cell velocity field analyzed by PIV and cell trajectories in HeLa and

746 MDCK cell sheets. Scale bar: 75  $\mu\text{m}$ . (d) The statistical analysis of cell speed (rms

747 velocity) measured by PIV in HeLa and MDCK cell sheets. ( $n = 10$ ). (e) The cell shape

748 index distribution of HeLa and MDCK cell sheets. Scale bar: 50  $\mu\text{m}$ . (f) The statistical

749 analysis of cell shape index of HeLa and MDCK cell sheets. ( $n = 10$ ).

750

751 **Figure 7**

752

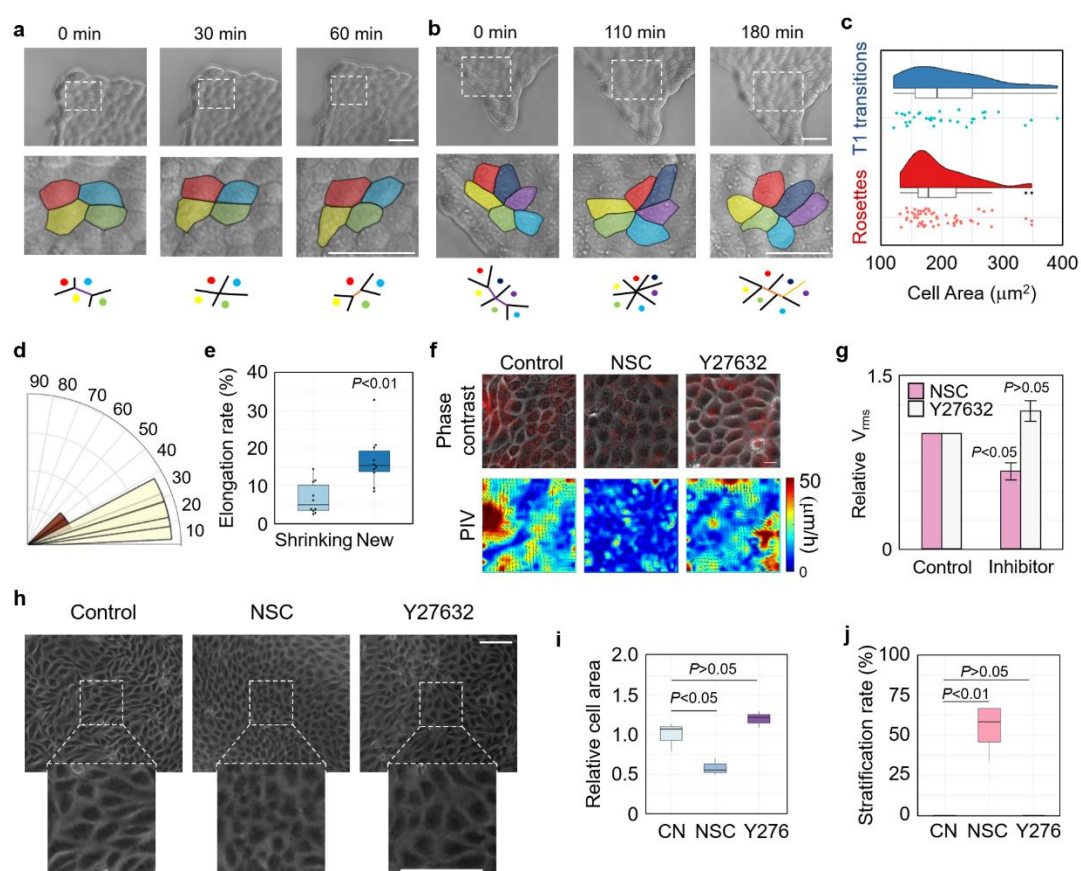

753

754

755 **Figure 7. Tissue fluidity controls 2D/3D morphogenetic transition by regulating**

756 **compression gradient progression.** (a) Representative image of T1 transition at

757 MDCK cell sheet edges during growth. Cell rearrangements are illustrated at the bottom

758 layer (purple line: shrinking junction, orange line: new junction). (min: minute). Scale

759 bar: 50  $\mu\text{m}$ . (b) Representative image of rosettes at MDCK cell sheet edges during

760 growth. Cell rearrangements are illustrated at the bottom layer (purple line: shrinking

761 junction, orange line: new junction). Scale bar: 50  $\mu\text{m}$ . (c) Cell area distributions of

762 cells be experiencing T1 transitions and rosettes. (d) Distribution of the angles between

763 new junctions and tissue protrusion directions. (e) Cell sheet elongation rate at the

764 direction of shrinking junctions or new junctions. (n = 10). (f) The velocity field  
765 superimposed on the corresponding phase contrast (upper panel) and velocity map  
766 (lower panel) images measured by PIV of MDCK cell sheet in the presence of inhibitors  
767 or vehicle. Scale bar: 20  $\mu\text{m}$ . (g) The statistical analysis of cell speed (rms velocity)  
768 measured by PIV of HeLa and MDCK cell sheets in the presence of inhibitors or vehicle.  
769 (n = 4). (h) Representative phase contrast images of MDCK cell sheet in the presence  
770 of inhibitors or vehicle. Scale bar: 100  $\mu\text{m}$ . (i) The statistical analysis of the individual  
771 cell area of MDCK cell sheet in the presence of inhibitors or vehicle. (n = 3). (j) The  
772 stratification percentage of MDCK cell sheet in the presence of inhibitors or vehicle. (n  
773 = 4).  
774

775 **Figure 8**

776

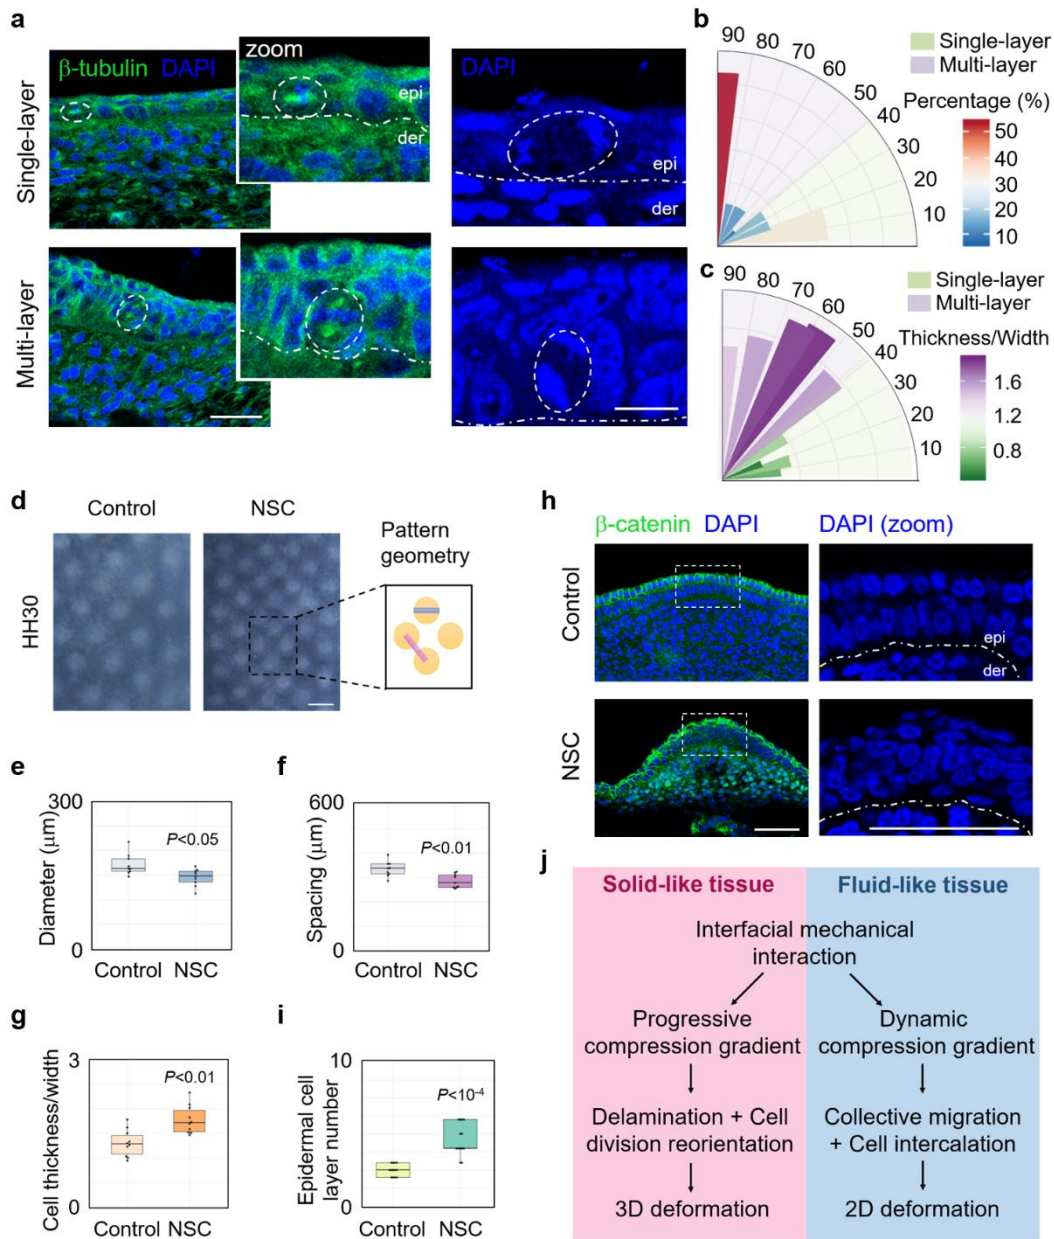

777

778

779 **Figure 8. Progression of compression gradient contributes to epidermal cell**

780 **stratification during chicken skin development.** (a) Images of embryonic chicken

781 skin showing the orientation of mitoses relative to the basement membrane (white

782 dotted line) in the magnified images (zoom), separating epidermis (epi) from dermis

783 (der). White dotted circles indicate the mitotic cells in metaphase (left) and anaphase

784 (right). DAPI marks the DNA and  $\beta$ -tubulin antibody immunofluorescence staining  
785 marks the spindle. Scale bar: 10  $\mu$ m. (b) Distribution of the spindle-axis angles of cells  
786 in single-layered or multi-layered epithelia of embryonic chicken skin. (c) Distribution  
787 of the spindle-axis angles of cells with different cell deformation (thickness/width) in  
788 single-layered or multi-layered epithelia of embryonic chicken skin. (d) Reconstitution  
789 culture of embryonic chicken skin with or without NSC23766 (NSC). Scale bar: 500  
790  $\mu$ m. Quantification of (e) spacing and (f) diameter as pattern geometry parameters as  
791 illustrated in the right panel of (d). (n = 10). (g) Quantification of cell deformation of  
792 epidermis in in the presence of NSC or vehicle. (n = 10). (h) Representative cross  
793 section image of  $\beta$ -catenin and nucleus stained by  $\beta$ -catenin antibody and DAPI  
794 respectively in reconstitution cultured embryonic chicken skin with or without  
795 NSC23766 (NSC). Scale bar: 50  $\mu$ m. (i) Quantification of layer number of epidermis  
796 in (h). (n = 14). (j) Model of 2D and 3D morphogenesis controlled by the interfacial  
797 mechanical interactions in multi-layered systems with different tissue fluidity.  
798  
799



## 800 **Supplementary Materials**

### 801 **Theory model**

802

803 The theoretical model is shown in Fig. 3a. The cell monolayer is modeled as a thin  
804 film, which is attached on the surface of a rigid substrate. Direction of the tangential  
805 adhesion force between the cell and substrate is contrary to the relative motion. Thus,  
806 compression would be induced when the cell monolayer is growing on the substrate.  
807 The tangential adhesion force is assumed as  $f = f(r)$ , where  $r$  is the distance  
808 between the cell and the center of the monolayer.  $f$  is concerned with the tangential  
809 adhesion between the cell and substrate, which is related to the cell type, stiffness of  
810 substrate and the rate of cell division or growth. By analyzing the stress state of the  
811 monolayer and solving the equilibrium equation, one can obtain the distribution of the  
812 equi-biaxial compressive stress in the monolayer

$$813 \quad \sigma_r = \frac{1}{h} \int_r^R f \, dr \quad (1)$$

814 Here  $R$  is the outer radius of the cell monolayer, and  $h$  is the thickness of cell sheet.

815 The compressive strain can be obtained by the constitutive relation as

$$816 \quad \varepsilon_r = \frac{1-\nu}{Eh} \sigma_r \quad (2)$$

817 where  $E, \nu$  are the modulus and Poisson's ratio, respectively. The central region of  
818 the monolayer would sustain higher level of compression than the cells in other regions.  
819 Thus, cell extrusion is most likely to occur in the central region, which is consistent  
820 with the experimental observations. The maximum compressive strain in the cells can  
821 be obtained as

822 
$$\varepsilon_{\max} = \frac{1-\nu}{Eh} \int_0^R f \, dr \quad (3)$$

823 which depends on the cell-substrate interactions and area of the cell monolayer. Based  
824 on Eq. (2), one can also obtain the cell area

825 
$$A/A_0 = (1-\varepsilon)^2 \quad (4)$$

826 where  $A_0$  is the normal area of a full-grown cell without sustaining compression. Eq.  
827 (4) demonstrates that distribution of cell area can reflect the strain state in the cell  
828 monolayer. With cell proliferation, radius of the cell monolayer increases, and area of  
829 cells in the central region is reduced, indicating that the cell monolayer has a high level  
830 of compression in the central region.

831 Given the distribution of the interfacial adhesion force, one can obtain the  
832 distribution of the compressive strain and cell area of the cell monolayer. In this work,  
833 the tangential adhesion force is assumed to be uniform over the cell monolayer. Thus,  
834 the maximum compressive strain in the cell and the distribution of the cell area can be  
835 given by

836 
$$\varepsilon_{\max} = \frac{1-\nu}{Eh} fR \quad (5)$$

837 
$$A/A_0 = \left[ 1 - \frac{1-\nu}{Eh} f(r-R) \right]^2 \quad (6)$$

838 Based on Eq. (4), distribution of the compressive strains in the HeLa cells in  
839 experiments can be obtained by analyzing the distribution of cell area, which is shown  
840 in Fig. 2b. The sequence in Fig. 2b shows the morphologies of growing HeLa cells with  
841 the distribution of the compressive strains given in Fig. 5. The size of the cell monolayer  
842 sheet grows bigger along with the cell proliferation, generating higher level of  
843 compressive stress in the monolayer. Areas of individual cells in the central region are  
844 reduced due to the increased compressive strains. The experimental observations and

845 calculations are consistent with the theoretical predictions.

846 To validate the theoretical model, finite element simulations are performed to explore  
847 the relation between the cell-substrate interactions and stress field in growing cells.  
848 Results of finite element simulations are shown in Fig. 3d. In the finite element model,  
849 the growing cell monolayer sheet was placed on a stiff substrate with the interfacial  
850 fraction factor being controlled. The cell sheet was under isotropic expansion to  
851 simulate the growth. More than 12,000 linear hexahedral elements were adopted to in  
852 the simulations. The cell sheet was modeled as the linear elastic material. With the  
853 increase of the growth strain, compressive stresses in the cell monolayer are generated  
854 due to the cell-substrate interactions, and the central region has a higher level of  
855 compressive stress. The stress level can be reduced by regulating the cell-substrate  
856 interactions (Fig. 3d). Finite element simulations are consistent with experimental  
857 observation and theoretical analysis.

858 The elastic strain energy stored in the cell would also increase with the cell  
859 proliferation. When the elastic strain energy in the cell is small, interfacial normal  
860 adhesion would impose restriction on cell extrusion, making the cell monolayer grow  
861 in plane. Thus, higher compressive stress would be generated further. When the  
862 compressive stress reaches a critical value, elastic strain energy stored in the cell may  
863 be greater than the energy needed for the occurrence of the interfacial delamination. In  
864 this critical condition, cell extrusion may happen, and the elastic strain energy can be  
865 released. The critical condition for the cell extrusion can be written as

866 
$$\gamma A = \frac{E}{1-\nu} \varepsilon_{\max}^2 V \quad (7)$$

867 The left hand and right hand of the equation refer to the energy for the interfacial  
868 delamination and elastic strain energy in the cell, respectively.  $\gamma$  is the energy per area  
869 for the interfacial delamination, which is related to the interfacial normal adhesion

870 between the cell and substrate.  $\varepsilon_{\max}$  is the maximum strain in the cell, and  $V$  is the  
871 cell volume. Eq. (6) demonstrates that there exists a critical area or size of the cell  
872 monolayer at the critical condition of cell extrusion. The critical size of the cell  
873 monolayer sheet depends on the mechanical properties of cell and cell-substrate  
874 interactions. The cell extrusion can be controlled by regulating the modulus of the cell  
875 and cell-substrate interactions.

876 When the normal adhesion between the cell monolayer and the substrate is enhanced,  
877 cell extrusion would be more difficult to happen, and the cell would bear larger  
878 compression before extrusion. When the tangential adhesion is larger, higher level of  
879 compression would be induced, and the cell extrusion is more likely to happen. The  
880 adhesion between the cells may have effect on the cell sheet stress. Maximum  
881 compressive stress in the cell monolayer may be reduced when lowering down the  
882 adhesion between the cells. Thus, cell extrusion would be more difficult to happen.  
883 Cytoskeleton is the main components that determine the cell mechanics. The  
884 cytoskeleton can bear compressive stress and store elastic strain energy. If the  
885 cytoskeleton in the cell is suppressed, cell extrusion is hard to happen. These predictions  
886 were confirmed by experiments (Fig. 3e-g).

887 Shape of the cell can be changed due to the compression induced by the interfacial  
888 shear stress. Thus, the orientation of the cell division may be altered. During the  
889 evolution of the cell monolayer sheet, cell shape in the central region was changed from  
890 flat to columnar due to the high level of compression stress. While in the periphery of  
891 the monolayer, cell shape maintained flat. Stretch ratio of the cell in the direction of  
892 thickness can be written as

893 
$$\lambda = 1 + \frac{2\nu}{1-\nu} \varepsilon_r \quad (8)$$

894 Base on the stretch ratio in Eq. (8), cell thickness/width characterizing cell shape can  
895 be obtained as

896 
$$\frac{h}{b} = \frac{\lambda}{1 - \varepsilon_r} \frac{h_0}{b_0} \quad (9)$$

897 Here  $h$  and  $b$  refer to the cell thickness and width.  $h_0$  and  $b_0$  refer to the initial  
898 thickness and width of the cell without sustaining compression. In the periphery of the  
899 monolayer, cell thickness/width is small since the compressive strain in the cell is small.  
900 While in the central region with high level of compressive strain, cell thickness/width  
901 can be very large. This phenomenon of cell shape variation induced by the interfacial  
902 mechanical interaction is also confirmed by the finite element simulations, as shown in  
903 Fig. 4c.

904

905 **Supplementary Figures**

906

907 **Supplementary Figure S1**

908

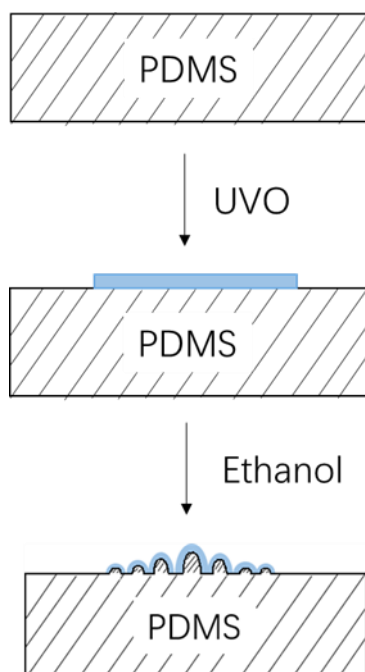

909

910

911 **Figure S1. Surface wrinkling induced by differential expansion in a film-substrate**

912 **system (Zhao et al., 2015b).** Polydimethylsiloxane (PDMS) was exposed to UV/Ozone

913 (UVO) for 10 – 55 minutes to form a stiff solvent-responsive oxide layer (highlighted

914 in blue) on the surface. Then dropping an ethanol/glycerol mixture solution containing

915 60% – 100% ethanol by volume to induce surface wrinkling.

916 **Supplementary Figure S2**

917

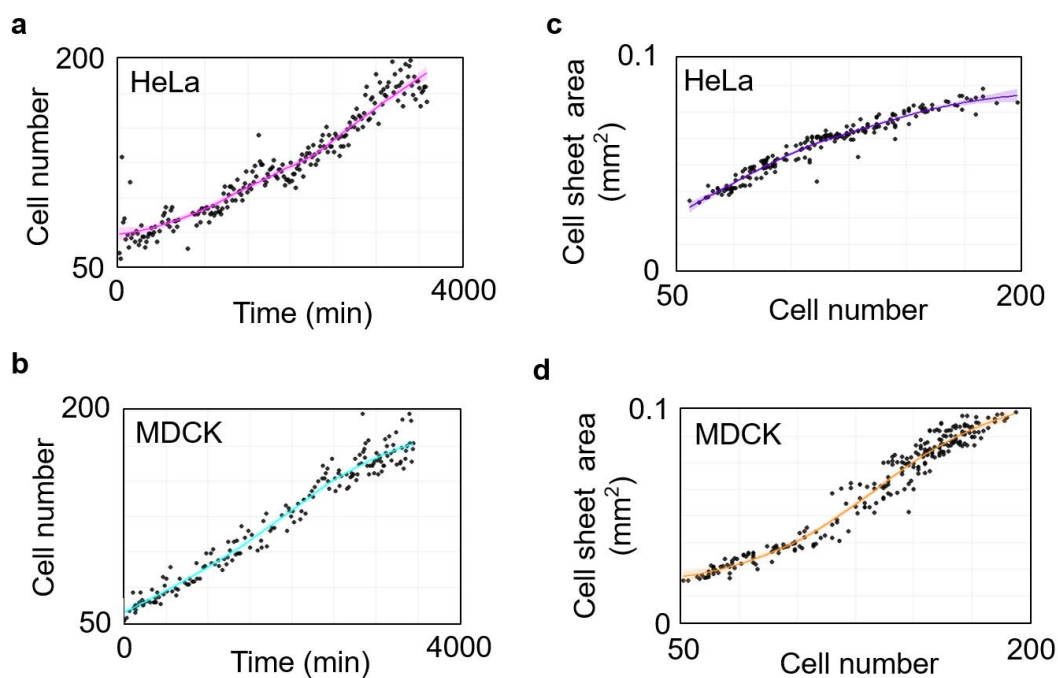

918

919 **Figure S2. Proliferation and expansion of cell sheets during growth.** The statistical

920 analysis of the cell number during HeLa cell sheet (a) and MDCK cell sheet (b) growth.

921 The statistical analysis of the cell sheet area during HeLa cell sheet (c) and MDCK cell

922 sheet (d) growth.

923

924 **Supplementary Figure S3**

925

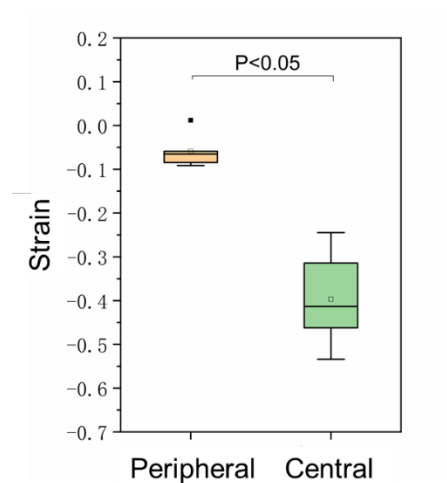

926

927

928 **Figure S3. Single cell tracing of compressive strain.** The plane strain of single cells  
929 in central and peripheral regions of cell sheets during 24 hours analyzed by holographic  
930 imaging cytometer (n = 6).

931



932 **Supplementary Figure S4**

933

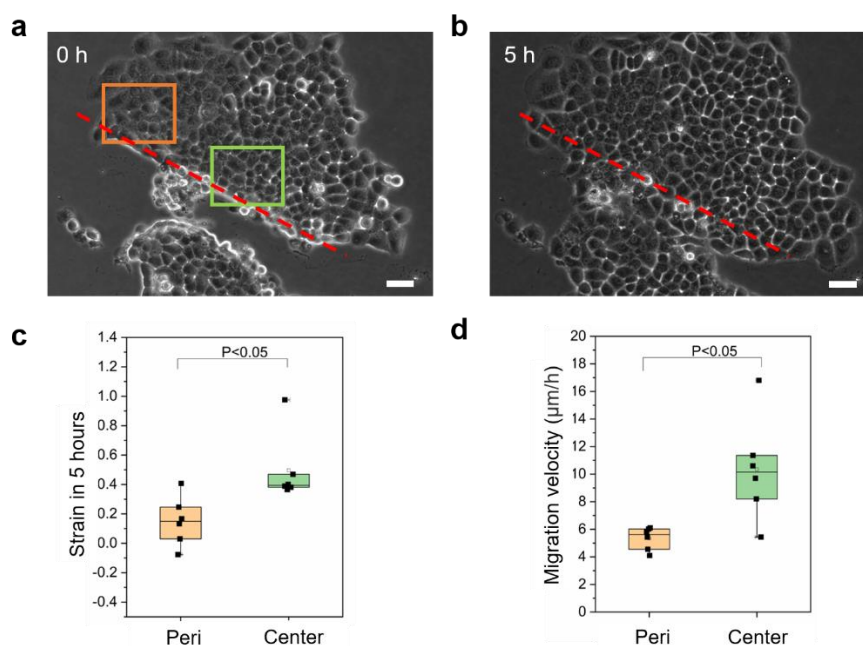

934

935 **Figure S4. Cell sheet scratch assay.** The representative image of cell sheet upon (a)  
936 and 5 hours after (b) scratch passing through the center (green box) and edge (orange  
937 box) of the cell sheet. The expansion (c) and migration speed (d) were compared  
938 between cells in the central region and peripheral region of the cell sheet. Scale bar: 50  
939  $\mu\text{m}$ , ( $n = 6$ ).

940 **Supplementary Figure S5**

941

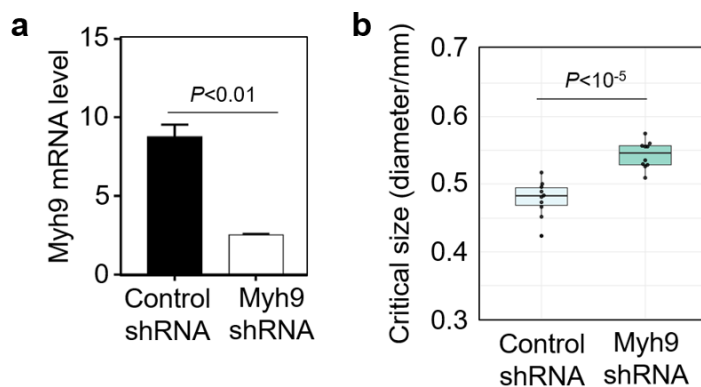

942

943 **Figure S5. Inhibition of Myosin effects the emergence of 3D morphogenesis. (a)**

944 The mRNA level of myosin heavy chain 9 gene (myh9) in HeLa cells transfected with

945 myh9 shRNA and control shRNA. (n = 3). (b) The critical sizes for morphogenesis in

946 myh9 shRNA cells and control cells. (n = 10).

947

948 **Supplementary Figure S6**

949

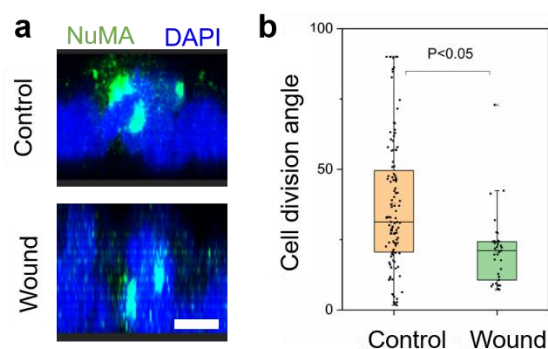

950

951

952 **Figure S6. Cell division angle after scratch.** (a) Representative XZ slice image of  
953 NuMA and nucleus stained by NuMA antibody and DAPI respectively in the control  
954 and wound of HeLa cell sheet. (b) The cell division angle in the center of cell sheet  
955 without (Control) or with (Wound) scratch. Scale bar: 10  $\mu$ m.

956

957 **Supplementary Figure S7**

958

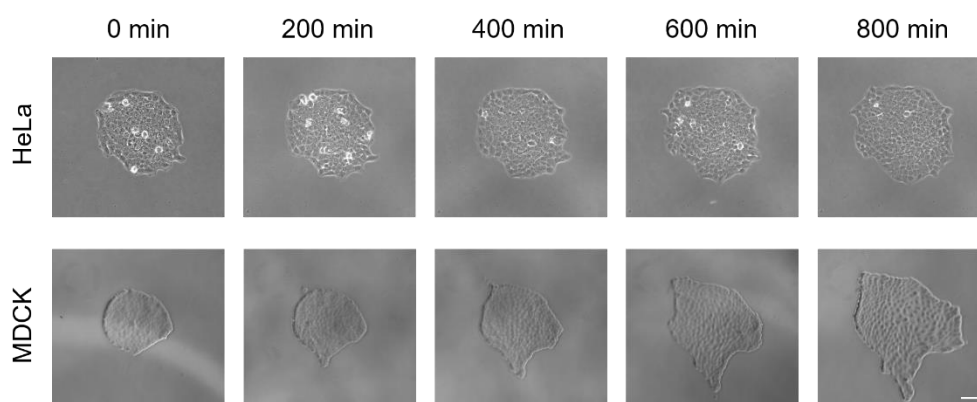

959  
960

961 **Figure S7. Different deformation pattern between HeLa and MDCK cell sheets**  
962 **during growth.** Representative phase contrast images of a growing monoclonal HeLa  
963 and MDCK cell sheet captured at the indicated time (min: minute). Scale bar: 100  $\mu$ m.

964 **Supplementary Figure S8**

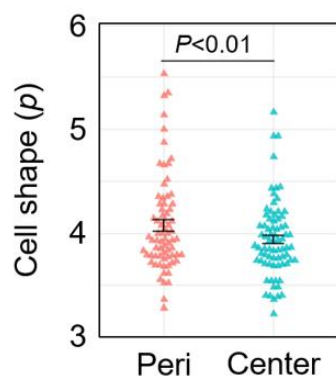

965

966

967 **Figure S8. Cell shape index in the peripheral and central regions of HeLa cell sheet.**

968 The statistical analysis of cell shape index of cells in the peripheral region and central

969 region of HeLa cell sheet. (n = 75).

970

971 **Supplementary Figure S9**

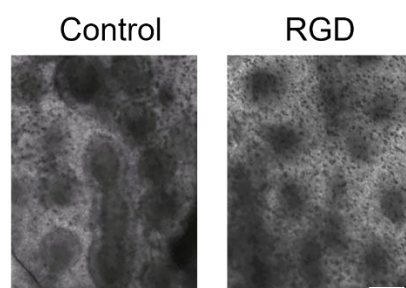

972

973

974 **Figure S9. Disrupting the interfacial mechanical interaction between epidermal**

975 **and dermal layers attenuated the morphogenesis of primordium.** *Ex vivo* culture of

976 embryonic chicken skin with or without RGD. Scale bar: 500  $\mu\text{m}$ .

977

978 **Supplementary Table**

979

| ECM type                 | Critical diameter( $\mu\text{m}$ ) | N  |
|--------------------------|------------------------------------|----|
| No pre-coating ECM       | 463.8 $\pm$ 18.9                   | 10 |
| Fibronectin              | 493.8 $\pm$ 23.9                   | 10 |
| Gelatin                  | 489.1 $\pm$ 19.8                   | 10 |
| Collagen                 | 520.3 $\pm$ 21.8                   | 10 |
| Collogen (40 kPa PA gel) | 413.8 $\pm$ 9.6                    | 5  |
| Collogen (1 kPa PA gel)  | 342.6 $\pm$ 26.0                   | 4  |

980

981

982 **Table S1.** The critical size for 3D morphogenesis of growing cell sheet on different

983 types of ECM and stiffness (polyacrylamide gel).

984

985

986

987 **Supplementary Movies**

988

989 **Supplementary Movie 1.** Symmetric cell division before critical compression during

990 HeLa cell sheet growth visualized by HoloMonitor M4 time-lapse cytometer.

991

992

993 **Supplementary Movie 2.** Asymmetric cell division after critical compression during

994 HeLa cell sheet growth visualized by HoloMonitor M4 time-lapse cytometer.

995

996

997 **Supplementary Movie 3.** PIV analysis during HeLa and MDCK cell sheets growth.

998

999

1000 **Supplementary Movie 4.** Time-lapse imaging of MDCK cell sheet during growth.

1001

1002

1003 **Supplementary Movie 5.** PIV analysis during MDCK cell sheet growth in the presence

1004 of inhibitors or vehicle (control).

1005

1006
